# Supplementary material for: The Dartmouth Database of Children’s Faces: Acquisition and Validation of a New Face Stimulus Set
Source: PubMed Central journal article supplement (PMC3828408; doi:10.1371/journal.pone.0079131), 2013-11-14
Supplement: pone.0079131.s001.pdf [file pone.0079131.s001.pdf]

**Table S1:  
Image ratings**

| Males                       |                              |                       |            |
|-----------------------------|------------------------------|-----------------------|------------|
| Model ID                    | Image ID                     | Intended Expression   | Rating (%) |
| 4                           | 04_13y_surprise_front2       | Surprised             | 95.0       |
|                             | 04_13y_surprise              | Surprised             | 90.0       |
|                             | 04_13yoM_Angry_front2        | Angry                 | 80.0       |
|                             | 04_13yoM_Angry               | Angry                 | 65.0       |
|                             | 04_13yoM_disgust_front2      | Disgusted             | 35.0       |
|                             | 04_13yoM_disgust             | Disgusted             | 55.0       |
|                             | 04_13yoM_Fear_front2         | Afraid                | 55.0       |
|                             | 04_13yoM_Fear                | Afraid                | 70.0       |
|                             | 04_13yoM                     | Neutral               | 95.0       |
|                             | 04_13yoM_front2              | Neutral               | 95.0       |
|                             | 04_13yoM_HappyNoTeeth_front2 | Content               | 100.0      |
|                             | 04_13yoM_HappyNoTeeth        | Content               | 100.0      |
|                             | 04_13yoM_HappyTeeth_front2   | Happy                 | 100.0      |
|                             | 04_13yoM_HappyTeeth          | Happy                 | 100.0      |
|                             | 04_13yom_sad                 | Sad                   | 70.0       |
|                             | 10                           | 10_9y_surprise_front2 | Surprised  |
| 10_9y_surprise              |                              | Surprised             | 85.0       |
| 10_9yoM_Angry_front2        |                              | Angry                 | 75.0       |
| 10_9yoM_Angry               |                              | Angry                 | 40.0       |
| 10_9yoM_disgust_front2      |                              | Disgusted             | 90.0       |
| 10_9yoM_disgust             |                              | Disgusted             | 90.0       |
| 10_9yoM_Fear_front2         |                              | Afraid                | 15.0       |
| 10_9yoM_Fear                |                              | Afraid                | 35.0       |
| 10_9yoM                     |                              | Neutral               | 100.0      |
| 10_9yoM_front2              |                              | Neutral               | 90.0       |
| 10_9yoM_HappyNoTeeth_front2 |                              | Content               | 100.0      |
| 10_9yoM_HappyNoTeeth        |                              | Content               | 90.0       |
| 10_9yoM_HappyTeeth_front2   |                              | Happy                 | 95.0       |
| 10_9yoM_HappyTeeth          |                              | Happy                 | 100.0      |
| 10_9yom_sad_front2          |                              | Sad                   | 20.0       |
| 10_9yom_sad                 |                              | Sad                   | 55.0       |
| 11                          | 11_10y_surprise_front2       | Surprised             | 85.0       |
|                             | 11_10y_surprise              | Surprised             | 95.0       |
|                             | 11_10yoM_Angry_front2        | Angry                 | 10.0       |
|                             | 11_10yoM_Angry               | Angry                 | 20.0       |
|                             | 11_10yoM_disgust_front2      | Disgusted             | 60.0       |
|                             | 11_10yoM_disgust             | Disgusted             | 75.0       |
|                             | 11_10yoM_Fear_front2         | Afraid                | 0.0        |
|                             | 11_10yoM_Fear                | Afraid                | 5.0        |
|                             | 11_10yoM                     | Neutral               | 90.0       |
|                             | 11_10yoM_front2              | Neutral               | 95.0       |
|                             | 11_10yoM_HappyNoTeeth_front2 | Content               | 100.0      |

| Females  |                              |                     |            |
|----------|------------------------------|---------------------|------------|
| Model ID | Image ID                     | Intended Expression | Rating (%) |
| 13       | 13_11yoF_Angry_front1        | Angry               | 70.0       |
|          | 13_11yoF_Angry_front2        | Angry               | 70.0       |
|          | 13_11yoF_Disgust_front1      | Disgusted           | 65.0       |
|          | 13_11yoF_Disgust_front2      | Disgusted           | 75.0       |
|          | 13_11yoF_Fear_front1         | Afraid              | 75.0       |
|          | 13_11yoF_Fear_front2         | Afraid              | 65.0       |
|          | 13_11yoF_front1              | Neutral             | 80.0       |
|          | 13_11yoF_front2              | Neutral             | 45.0       |
|          | 13_11yoF_HappyNoTeeth_front1 | Content             | 95.0       |
|          | 13_11yoF_HappyNoTeeth_front2 | Content             | 90.0       |
|          | 13_11yoF_HappyTeeth_front1   | Happy               | 100.0      |
|          | 13_11yoF_HappyTeeth_front2   | Happy               | 95.0       |
|          | 13_11yoF_Sad_front1          | Sad                 | 75.0       |
|          | 13_11yoF_Sad_front2          | Sad                 | 85.0       |
|          | 13_11yoF_Surprise_front1     | Surprised           | 80.0       |
|          | 13_11yoF_Surprise_front2     | Surprised           | 75.0       |
| 16       | 16_11yoF_Angry_front1        | Angry               | 30.0       |
|          | 16_11yoF_Angry_front2        | Angry               | 75.0       |
|          | 16_11yoF_Disgust_front1      | Disgusted           | 55.0       |
|          | 16_11yoF_Disgust_front2      | Disgusted           | 80.0       |
|          | 16_11yoF_Fear_front1         | Afraid              | 75.0       |
|          | 16_11yoF_Fear_front2         | Afraid              | 70.0       |
|          | 16_11yoF_front1              | Neutral             | 90.0       |
|          | 16_11yoF_front2              | Neutral             | 80.0       |
|          | 16_11yoF_HappyNoTeeth_front1 | Content             | 95.0       |
|          | 16_11yoF_HappyNoTeeth_front2 | Content             | 95.0       |
|          | 16_11yoF_HappyTeeth_front1   | Happy               | 95.0       |
|          | 16_11yoF_HappyTeeth_front2   | Happy               | 95.0       |
|          | 16_11yoF_Sad_front1          | Sad                 | 50.0       |
|          | 16_11yoF_Sad_front2          | Sad                 | 40.0       |
|          | 16_11yoF_Surprise_front1     | Surprised           | 65.0       |
|          | 16_11yoF_Surprise_front2     | Surprised           | 65.0       |
| 22       | 22_9yoF_Angry_front1         | Angry               | 50.0       |
|          | 22_9yoF_Angry_front2         | Angry               | 90.0       |
|          | 22_9yoF_Disgust_front1       | Disgusted           | 15.0       |
|          | 22_9yoF_Disgust_front2       | Disgusted           | 50.0       |
|          | 22_9yoF_Fear_front1          | Afraid              | 10.0       |
|          | 22_9yoF_Fear_front2          | Afraid              | 30.0       |
|          | 22_9yoF_front1               | Neutral             | 90.0       |
|          | 22_9yoF_front2               | Neutral             | 85.0       |
|          | 22_9yoF_HappyNoTeeth_front1  | Content             | 90.0       |
|          | 22_9yoF_HappyNoTeeth_front2  | Content             | 85.0       |

| Males    |          |                     |            |
|----------|----------|---------------------|------------|
| Model ID | Image ID | Intended Expression | Rating (%) |

|                              |                             |                        |           |
|------------------------------|-----------------------------|------------------------|-----------|
| 11 cont...                   | 11_10yoM_HappyNoTeeth       | Content                | 100.0     |
|                              | 11_10yoM_HappyTeeth_front2  | Happy                  | 100.0     |
|                              | 11_10yoM_HappyTeeth         | Happy                  | 100.0     |
|                              | 11_10yom_sad_front2         | Sad                    | 80.0      |
|                              | 11_10yom_sad_front3         | Sad                    | 80.0      |
|                              | 11_10yom_sad_front4         | Sad                    | 85.0      |
|                              | 11_10yom_sad                | Sad                    | 85.0      |
| 27                           | 27_9y_surprise_front2       | Surprised              | 90.0      |
|                              | 27_9y_surprise              | Surprised              | 85.0      |
|                              | 27_9yoM_Angry_front2        | Angry                  | 65.0      |
|                              | 27_9yoM_Angry               | Angry                  | 65.0      |
|                              | 27_9yoM_disgust_front2      | Disgusted              | 90.0      |
|                              | 27_9yoM_disgust             | Disgusted              | 90.0      |
|                              | 27_9yoM_Fear_front2         | Afraid                 | 45.0      |
|                              | 27_9yoM_Fear                | Afraid                 | 30.0      |
|                              | 27                          | Neutral                | 80.0      |
|                              | 27_9yoM_front2              | Neutral                | 65.0      |
|                              | 27_9yoM_HappyNoTeeth_front2 | Content                | 60.0      |
|                              | 27_9yoM_HappyNoTeeth        | Content                | 80.0      |
|                              | 27_9yoM_HappyTeeth_front2   | Happy                  | 100.0     |
|                              | 27_9yoM_HappyTeeth          | Happy                  | 100.0     |
|                              | 27_9yom_sad_front2          | Sad                    | 90.0      |
|                              | 27_9yom_sad                 | Sad                    | 100.0     |
|                              | 28                          | 28_11y_surprise_front2 | Surprised |
| 28_11y_surprise              |                             | Surprised              | 95.0      |
| 28_11yoM_Angry_front2        |                             | Angry                  | 20.0      |
| 28_11yoM_Angry               |                             | Angry                  | 35.0      |
| 28_11yoM_disgust_front2      |                             | Disgusted              | 90.0      |
| 28_11yoM_disgust_front3      |                             | Disgusted              | 90.0      |
| 28_11yoM_disgust             |                             | Disgusted              | 60.0      |
| 28_11yoM_Fear_front2         |                             | Afraid                 | 0.0       |
| 28_11yoM_Fear                |                             | Afraid                 | 5.0       |
| 28_11yoM                     |                             | Neutral                | 85.0      |
| 28_11yoM_front2              |                             | Neutral                | 95.0      |
| 28_11yoM_HappyNoTeeth_front2 |                             | Content                | 95.0      |
| 28_11yoM_HappyNoTeeth        |                             | Content                | 85.0      |
| 28_11yoM_HappyTeeth_front2   |                             | Happy                  | 100.0     |
| 28_11yoM_HappyTeeth          |                             | Happy                  | 100.0     |
| 28_11yom_sad_front2          |                             | Sad                    | 100.0     |
| 28_11yom_sad                 |                             | Sad                    | 95.0      |
| 29                           | 29_15y_surprise_front2      | Surprised              | 90.0      |

| Females  |          |                     |            |
|----------|----------|---------------------|------------|
| Model ID | Image ID | Intended Expression | Rating (%) |

|                              |                             |                       |       |
|------------------------------|-----------------------------|-----------------------|-------|
| 22 cont...                   | 22_9yoF_HappyTeeth_front1   | Happy                 | 100.0 |
|                              | 22_9yoF_HappyTeeth_front2   | Happy                 | 85.0  |
|                              | 22_9yoF_Sad_front1          | Sad                   | 90.0  |
|                              | 22_9yoF_Sad_front2          | Sad                   | 85.0  |
|                              | 22_9yoF_Surprise_front1     | Surprised             | 95.0  |
|                              | 22_9yoF_Surprise_front2     | Surprised             | 90.0  |
|                              | 25                          | 25_13yoF_Angry_front1 | Angry |
| 25_13yoF_Angry_front2        |                             | Angry                 | 50.0  |
| 25_13yoF_Disgust_front1      |                             | Disgusted             | 90.0  |
| 25_13yoF_Disgust_front2      |                             | Disgusted             | 75.0  |
| 25_13yoF_Fear_front1         |                             | Afraid                | 60.0  |
| 25_13yoF_Fear_front2         |                             | Afraid                | 45.0  |
| 25_13yoF_front1              |                             | Neutral               | 85.0  |
| 25_13yoF_front2              |                             | Neutral               | 75.0  |
| 25_13yoF_HappyNoTeeth_front1 |                             | Content               | 50.0  |
| 25_13yoF_HappyNoTeeth_front2 |                             | Content               | 60.0  |
| 25_13yoF_HappyTeeth_front1   |                             | Happy                 | 100.0 |
| 25_13yoF_HappyTeeth_front2   |                             | Happy                 | 95.0  |
| 25_13yoF_Sad_front1          |                             | Sad                   | 85.0  |
| 25_13yoF_Sad_front2          |                             | Sad                   | 80.0  |
| 25_13yoF_Surprise_front1     |                             | Surprised             | 60.0  |
| 25_13yoF_Surprise_front2     |                             | Surprised             | 85.0  |
| 26                           |                             | 26_7yoF_Angry_front1  | Angry |
|                              | 26_7yoF_Angry_front2        | Angry                 | 55.0  |
|                              | 26_7yoF_Disgust_front1      | Disgusted             | 85.0  |
|                              | 26_7yoF_Disgust_front2      | Disgusted             | 60.0  |
|                              | 26_7yoF_Fear_front1         | Afraid                | 0.0   |
|                              | 26_7yoF_Fear_front2         | Afraid                | 0.0   |
|                              | 26_7yoF_front1              | Neutral               | 80.0  |
|                              | 26_7yoF_front2              | Neutral               | 85.0  |
|                              | 26_7yoF_HappyNoTeeth_front1 | Content               | 95.0  |
|                              | 26_7yoF_HappyNoTeeth_front2 | Content               | 100.0 |
|                              | 26_7yoF_HappyTeeth_front1   | Happy                 | 95.0  |
|                              | 26_7yoF_HappyTeeth_front2   | Happy                 | 95.0  |
|                              | 26_7yoF_Sad_front1          | Sad                   | 100.0 |
|                              | 26_7yoF_Sad_front2          | Sad                   | 90.0  |
|                              | 26_7yoF_Surprise_front1     | Surprised             | 90.0  |
|                              | 26_7yoF_Surprise_front2     | Surprised             | 80.0  |
|                              | 32                          | 32_6yoF_Angry_front1  | Angry |
| 32_6yoF_Angry_front2         |                             | Angry                 | 95.0  |
| 32_6yoF_Disgust_front1       |                             | Disgusted             | 85.0  |

| Males    |          |                     |            |
|----------|----------|---------------------|------------|
| Model ID | Image ID | Intended Expression | Rating (%) |

|              |                              |           |       |
|--------------|------------------------------|-----------|-------|
| 29 cont...   | 29_15y_surprise              | Surprised | 95.0  |
|              | 29_15yoM_Angry_front2        | Angry     | 80.0  |
|              | 29_15yoM_Angry_front3        | Angry     | 85.0  |
|              | 29_15yoM_Angry               | Angry     | 75.0  |
|              | 29_15yoM_disgust_front2      | Disgusted | 95.0  |
|              | 29_15yoM_disgust_front3      | Disgusted | 95.0  |
|              | 29_15yoM_disgust             | Disgusted | 70.0  |
|              | 29_15yoM_Fear_front2         | Afraid    | 60.0  |
|              | 29_15yoM_Fear                | Afraid    | 60.0  |
|              | 29_15yoM                     | Neutral   | 100.0 |
|              | 29_15yoM_front2              | Neutral   | 100.0 |
|              | 29_15yoM_HappyNoTeeth_front2 | Content   | 100.0 |
|              | 29_15yoM_HappyNoTeeth        | Content   | 95.0  |
|              | 29_15yoM_HappyTeeth_front2   | Happy     | 100.0 |
|              | 29_15yoM_HappyTeeth          | Happy     | 100.0 |
|              | 29_15yom_sad_front2          | Sad       | 80.0  |
|              | 29_15yom_sad_front3          | Sad       | 95.0  |
|              | 29_15yom_sad                 | Sad       | 65.0  |
| 36           | 36_11y_surprise_front2       | Surprised | 90.0  |
|              | 36_11y_surprise              | Surprised | 95.0  |
|              | 36_11yoM_Angry_front2        | Angry     | 90.0  |
|              | 36_11yoM_Angry               | Angry     | 95.0  |
|              | 36_11yoM_disgust_front2      | Disgusted | 70.0  |
|              | 36_11yoM_disgust             | Disgusted | 75.0  |
|              | 36_11yoM_Fear_front2         | Afraid    | 30.0  |
|              | 36_11yoM_Fear                | Afraid    | 50.0  |
|              | 36_11yoM                     | Neutral   | 85.0  |
|              | 36_11yoM_front2              | Neutral   | 95.0  |
|              | 36_11yoM_HappyNoTeeth_front2 | Content   | 50.0  |
|              | 36_11yoM_HappyNoTeeth        | Content   | 70.0  |
|              | 36_11yoM_HappyTeeth_front2   | Happy     | 95.0  |
|              | 36_11yoM_HappyTeeth          | Happy     | 100.0 |
|              | 36_11yom_sad_front2          | Sad       | 95.0  |
| 36_11yom_sad | Sad                          | 100.0     |       |
| 37           | 37_8y_surprise_front2        | Surprised | 90.0  |
|              | 37_8y_surprise               | Surprised | 100.0 |
|              | 37_8yoM_Angry_front2         | Angry     | 80.0  |
|              | 37_8yoM_Angry                | Angry     | 65.0  |
|              | 37_8yoM_disgust_front2       | Disgusted | 90.0  |
|              | 37_8yoM_disgust              | Disgusted | 90.0  |
|              | 37_8yoM_Fear_front2          | Afraid    | 50.0  |

| Females  |          |                     |            |
|----------|----------|---------------------|------------|
| Model ID | Image ID | Intended Expression | Rating (%) |

|                             |                             |                        |           |      |
|-----------------------------|-----------------------------|------------------------|-----------|------|
| 32 cont...                  | 32_6yoF_Disgust_front2      | Disgusted              | 35.0      |      |
|                             | 32_6yoF_Fear_front1         | Afraid                 | 0.0       |      |
|                             | 32_6yoF_Fear_front2         | Afraid                 | 70.0      |      |
|                             | 32_6yoF_front1              | Neutral                | 45.0      |      |
|                             | 32_6yoF_front2              | Neutral                | 75.0      |      |
|                             | 32_6yoF_HappyNoTeeth_front1 | Content                | 95.0      |      |
|                             | 32_6yoF_HappyNoTeeth_front2 | Content                | 95.0      |      |
|                             | 32_6yoF_HappyTeeth_front1   | Happy                  | 100.0     |      |
|                             | 32_6yoF_HappyTeeth_front2   | Happy                  | 100.0     |      |
|                             | 32_6yoF_Sad_front1          | Sad                    | 100.0     |      |
|                             | 32_6yoF_Sad_front2          | Sad                    | 100.0     |      |
|                             | 32_6yoF_Surprise_front1     | Surprised              | 95.0      |      |
|                             | 32_6yoF_Surprise_front2     | Surprised              | 95.0      |      |
|                             | 33                          | 33_6yoF_Angry_front    | Angry     | 20.0 |
|                             |                             | 33_6yoF_Disgust_front1 | Disgusted | 80.0 |
|                             |                             | 33_6yoF_Disgust_front2 | Disgusted | 60.0 |
|                             |                             | 33_6yoF_Fear_front1    | Afraid    | 75.0 |
| 33_6yoF_Fear_front2         |                             | Afraid                 | 30.0      |      |
| 33_6yoF_front1              |                             | Neutral                | 95.0      |      |
| 33_6yoF_front2              |                             | Neutral                | 100.0     |      |
| 33_6yoF_HappyNoTeeth_front1 |                             | Content                | 70.0      |      |
| 33_6yoF_HappyNoTeeth_front2 |                             | Content                | 85.0      |      |
| 33_6yoF_HappyTeeth_front1   |                             | Happy                  | 100.0     |      |
| 33_6yoF_HappyTeeth_front2   |                             | Happy                  | 95.0      |      |
| 33_6yoF_Sad_front1          |                             | Sad                    | 100.0     |      |
| 33_6yoF_Sad_front2          |                             | Sad                    | 90.0      |      |
| 45                          | 45_7yoF_Angry_front1        | Angry                  | 60.0      |      |
|                             | 45_7yoF_Angry_front2        | Angry                  | 60.0      |      |
|                             | 45_7yoF_Disgust_front1      | Disgusted              | 85.0      |      |
|                             | 45_7yoF_Disgust_front2      | Disgusted              | 25.0      |      |
|                             | 45_7yoF_Fear_front1         | Afraid                 | 45.0      |      |
|                             | 45_7yoF_Fear_front2         | Afraid                 | 35.0      |      |
|                             | 45_7yoF_front1              | Neutral                | 100.0     |      |
|                             | 45_7yoF_front2              | Neutral                | 95.0      |      |
|                             | 45_7yoF_HappyNoTeeth_front1 | Content                | 100.0     |      |
|                             | 45_7yoF_HappyNoTeeth_front2 | Content                | 75.0      |      |
|                             | 45_7yoF_HappyTeeth_front1   | Happy                  | 100.0     |      |
|                             | 45_7yoF_HappyTeeth_front2   | Happy                  | 100.0     |      |
| 45_7yoF_Sad_front1          | Sad                         | 95.0                   |           |      |

| Males    |          |                     |            |
|----------|----------|---------------------|------------|
| Model ID | Image ID | Intended Expression | Rating (%) |

|              |                              |           |       |
|--------------|------------------------------|-----------|-------|
| 37 cont...   | 37_8yoM_Fear                 | Afraid    | 35.0  |
|              | 37_8yoM                      | Neutral   | 95.0  |
|              | 37_8yoM_front3               | Neutral   | 100.0 |
|              | 37_8yoM_HappyNoTeeth_front2  | Content   | 100.0 |
|              | 37_8yoM_HappyNoTeeth         | Content   | 100.0 |
|              | 37_8yoM_HappyTeeth_front2    | Happy     | 100.0 |
|              | 37_8yoM_HappyTeeth           | Happy     | 85.0  |
|              | 37_8yom_sad_front2           | Sad       | 100.0 |
|              | 37_8yom_sad                  | Sad       | 85.0  |
| 38           | 38_10y_surprise_front2       | Surprised | 90.0  |
|              | 38_10y_surprise              | Surprised | 90.0  |
|              | 38_10yoM_Angry_front2        | Angry     | 100.0 |
|              | 38_10yoM_Angry               | Angry     | 90.0  |
|              | 38_10yoM_disgust_front2      | Disgusted | 50.0  |
|              | 38_10yoM_disgust             | Disgusted | 75.0  |
|              | 38_10yoM_Fear_front2         | Afraid    | 45.0  |
|              | 38_10yoM_Fear                | Afraid    | 60.0  |
|              | 38_10yoM                     | Neutral   | 95.0  |
|              | 38_10yoM_front2              | Neutral   | 85.0  |
|              | 38_10yoM_HappyNoTeeth_front2 | Content   | 85.0  |
|              | 38_10yoM_HappyNoTeeth        | Content   | 95.0  |
|              | 38_10yoM_HappyTeeth_front2   | Happy     | 100.0 |
|              | 38_10yoM_HappyTeeth          | Happy     | 100.0 |
|              | 38_10yom_sad_front2          | Sad       | 100.0 |
| 38_10yom_sad | Sad                          | 90.0      |       |
| 40           | 40_12y_surprise_front2       | Surprised | 75.0  |
|              | 40_12y_surprise              | Surprised | 75.0  |
|              | 40_12yoM_Angry_front2        | Angry     | 95.0  |
|              | 40_12yoM_Angry               | Angry     | 90.0  |
|              | 40_12yoM_disgust_front2      | Disgusted | 80.0  |
|              | 40_12yoM_disgust             | Disgusted | 55.0  |
|              | 40_12yoM_Fear_front2         | Afraid    | 45.0  |
|              | 40_12yoM_Fear                | Afraid    | 45.0  |
|              | 40_12yoM                     | Neutral   | 90.0  |
|              | 40_12yoM_front2              | Neutral   | 95.0  |
|              | 40_12yoM_HappyNoTeeth_front2 | Content   | 100.0 |
|              | 40_12yoM_HappyNoTeeth        | Content   | 90.0  |
|              | 40_12yoM_HappyTeeth_front2   | Happy     | 95.0  |
|              | 40_12yoM_HappyTeeth          | Happy     | 80.0  |
|              | 40_12yom_sad_front2          | Sad       | 100.0 |
| 40_12yom_sad | Sad                          | 90.0      |       |

| Females  |          |                     |            |
|----------|----------|---------------------|------------|
| Model ID | Image ID | Intended Expression | Rating (%) |

|                          |                              |           |       |
|--------------------------|------------------------------|-----------|-------|
| 45 cont...               | 45_7yoF_Sad_front2           | Sad       | 85.0  |
|                          | 45_7yoF_Surprise_front1      | Surprised | 75.0  |
|                          | 45_7yoF_Surprise_front2      | Surprised | 80.0  |
| 52                       | 52_10yoF_Angry_front1        | Angry     | 100.0 |
|                          | 52_10yoF_Angry_front2        | Angry     | 95.0  |
|                          | 52_10yoF_Disgust_front1      | Disgusted | 75.0  |
|                          | 52_10yoF_Disgust_front2      | Disgusted | 50.0  |
|                          | 52_10yoF_Fear_front1         | Afraid    | 45.0  |
|                          | 52_10yoF_Fear_front2         | Afraid    | 40.0  |
|                          | 52_10yoF_front1              | Neutral   | 90.0  |
|                          | 52_10yoF_front2              | Neutral   | 100.0 |
|                          | 52_10yoF_HappyNoTeeth_front1 | Content   | 85.0  |
|                          | 52_10yoF_HappyNoTeeth_front2 | Content   | 75.0  |
|                          | 52_10yoF_HappyTeeth_front1   | Happy     | 100.0 |
|                          | 52_10yoF_HappyTeeth_front2   | Happy     | 100.0 |
|                          | 52_10yoF_Sad_front1          | Sad       | 100.0 |
|                          | 52_10yoF_Sad_front2          | Sad       | 55.0  |
|                          | 52_10yoF_Surprise_front1     | Surprised | 80.0  |
| 52_10yoF_Surprise_front2 | Surprised                    | 80.0      |       |
| 55                       | 55_10yoF_Angry_front1        | Angry     | 55.0  |
|                          | 55_10yoF_Angry_front2        | Angry     | 65.0  |
|                          | 55_10yoF_Disgust_front1      | Disgusted | 90.0  |
|                          | 55_10yoF_Disgust_front2      | Disgusted | 75.0  |
|                          | 55_10yoF_Fear_front1         | Afraid    | 60.0  |
|                          | 55_10yoF_Fear_front2         | Afraid    | 45.0  |
|                          | 55_10yoF_front1              | Neutral   | 90.0  |
|                          | 55_10yoF_front2              | Neutral   | 100.0 |
|                          | 55_10yoF_HappyNoTeeth_front1 | Content   | 70.0  |
|                          | 55_10yoF_HappyNoTeeth_front2 | Content   | 70.0  |
|                          | 55_10yoF_HappyTeeth_front1   | Happy     | 95.0  |
|                          | 55_10yoF_HappyTeeth_front2   | Happy     | 100.0 |
|                          | 55_10yoF_Sad_front1          | Sad       | 30.0  |
|                          | 55_10yoF_Sad_front2          | Sad       | 50.0  |
|                          | 55_10yoF_Surprise_front1     | Surprised | 80.0  |
| 55_10yoF_Surprise_front2 | Surprised                    | 95.0      |       |
| 57                       | 57_9yoF_Angry_front1         | Angry     | 70.0  |
|                          | 57_9yoF_Angry_front2         | Angry     | 90.0  |
|                          | 57_9yoF_Disgust_front1       | Disgusted | 45.0  |
|                          | 57_9yoF_Disgust_front2       | Disgusted | 40.0  |
|                          | 57_9yoF_Fear_front1          | Afraid    | 60.0  |
|                          | 57_9yoF_Fear_front2          | Afraid    | 50.0  |

| Males    |          |                     |            |
|----------|----------|---------------------|------------|
| Model ID | Image ID | Intended Expression | Rating (%) |

|                              |                             |                        |           |
|------------------------------|-----------------------------|------------------------|-----------|
| 41                           | 41_8y_surprise_front2       | Surprised              | 95.0      |
|                              | 41_8y_surprise              | Surprised              | 90.0      |
|                              | 41_8yoM_Angry_front2        | Angry                  | 20.0      |
|                              | 41_8yoM_Angry               | Angry                  | 50.0      |
|                              | 41_8yoM_disgust_front2      | Disgusted              | 100.0     |
|                              | 41_8yoM_disgust             | Disgusted              | 85.0      |
|                              | 41_8yoM_Fear_front2         | Afraid                 | 40.0      |
|                              | 41_8yoM_Fear                | Afraid                 | 25.0      |
|                              | 41_8yoM                     | Neutral                | 95.0      |
|                              | 41_8yoM_front2              | Neutral                | 90.0      |
|                              | 41_8yoM_HappyNoTeeth_front2 | Content                | 50.0      |
|                              | 41_8yoM_HappyNoTeeth        | Content                | 70.0      |
|                              | 41_8yoM_HappyTeeth_front2   | Happy                  | 100.0     |
|                              | 41_8yoM_HappyTeeth          | Happy                  | 100.0     |
|                              | 41_8yom_sad_front2          | Sad                    | 100.0     |
|                              | 41_8yom_sad                 | Sad                    | 95.0      |
|                              | 44                          | 44_11y_surprise_front2 | Surprised |
| 44_11y_surprise              |                             | Surprised              | 40.0      |
| 44_11yoM_Angry_front2        |                             | Angry                  | 70.0      |
| 44_11yoM_Angry               |                             | Angry                  | 85.0      |
| 44_11yoM_disgust_front2      |                             | Disgusted              | 45.0      |
| 44_11yoM_disgust             |                             | Disgusted              | 45.0      |
| 44_11yoM_Fear_front2         |                             | Afraid                 | 50.0      |
| 44_11yoM_Fear                |                             | Afraid                 | 60.0      |
| 44_11yoM                     |                             | Neutral                | 75.0      |
| 44_11yoM_front2              |                             | Neutral                | 100.0     |
| 44_11yoM_HappyNoTeeth_front2 |                             | Content                | 100.0     |
| 44_11yoM_HappyNoTeeth        |                             | Content                | 100.0     |
| 44_11yoM_HappyTeeth_front2   |                             | Happy                  | 90.0      |
| 44_11yoM_HappyTeeth          |                             | Happy                  | 100.0     |
| 44_11yom_sad_front2          |                             | Sad                    | 100.0     |
| 44_11yom_sad                 |                             | Sad                    | 90.0      |
| 48                           |                             | 48_11y_surprise_front2 | Surprised |
|                              | 48_11y_surprise             | Surprised              | 85.0      |
|                              | 48_11yoM_Angry_front2       | Angry                  | 0.0       |
|                              | 48_11yoM_Angry              | Angry                  | 15.0      |
|                              | 48_11yoM_disgust_front2     | Disgusted              | 40.0      |
|                              | 48_11yoM_disgust            | Disgusted              | 35.0      |
|                              | 48_11yoM_Fear_front2        | Afraid                 | 55.0      |
|                              | 48_11yoM_Fear               | Afraid                 | 60.0      |
|                              | 48_11yoM                    | Neutral                | 100.0     |

| Females  |          |                     |            |
|----------|----------|---------------------|------------|
| Model ID | Image ID | Intended Expression | Rating (%) |

|                             |                              |                       |       |
|-----------------------------|------------------------------|-----------------------|-------|
| 57 cont...                  | 57_9yoF_front1               | Neutral               | 95.0  |
|                             | 57_9yoF_front2               | Neutral               | 90.0  |
|                             | 57_9yoF_HappyNoTeeth_front1  | Content               | 95.0  |
|                             | 57_9yoF_HappyNoTeeth_front2  | Content               | 100.0 |
|                             | 57_9yoF_HappyTeeth_front1    | Happy                 | 100.0 |
|                             | 57_9yoF_HappyTeeth_front2    | Happy                 | 100.0 |
|                             | 57_9yoF_Sad_front1           | Sad                   | 50.0  |
|                             | 57_9yoF_Sad_front2           | Sad                   | 45.0  |
|                             | 57_9yoF_Surprise_front1      | Surprised             | 80.0  |
|                             | 57_9yoF_Surprise_front2      | Surprised             | 95.0  |
|                             | 61                           | 61_8yoF_Angry_front1  | Angry |
| 61_8yoF_Angry_front2        |                              | Angry                 | 75.0  |
| 61_8yoF_Disgust_front1      |                              | Disgusted             | 10.0  |
| 61_8yoF_Disgust_front2      |                              | Disgusted             | 10.0  |
| 61_8yoF_Fear_front1         |                              | Afraid                | 30.0  |
| 61_8yoF_Fear_front2         |                              | Afraid                | 50.0  |
| 61_8yoF_front1              |                              | Neutral               | 85.0  |
| 61_8yoF_front2              |                              | Neutral               | 85.0  |
| 61_8yoF_HappyNoTeeth_front1 |                              | Content               | 100.0 |
| 61_8yoF_HappyNoTeeth_front2 |                              | Content               | 95.0  |
| 61_8yoF_HappyTeeth_front1   |                              | Happy                 | 100.0 |
| 61_8yoF_HappyTeeth_front2   |                              | Happy                 | 95.0  |
| 61_8yoF_Sad_front1          |                              | Sad                   | 100.0 |
| 61_8yoF_Sad_front2          |                              | Sad                   | 95.0  |
| 61_8yoF_Surprise_front1     |                              | Surprised             | 95.0  |
| 61_8yoF_Surprise_front2     |                              | Surprised             | 95.0  |
| 62                          |                              | 62_10yoF_Angry_front1 | Angry |
|                             | 62_10yoF_Angry_front2        | Angry                 | 60.0  |
|                             | 62_10yoF_Disgust_front1      | Disgusted             | 95.0  |
|                             | 62_10yoF_Disgust_front2      | Disgusted             | 90.0  |
|                             | 62_10yoF_Fear_front1         | Afraid                | 45.0  |
|                             | 62_10yoF_Fear_front2         | Afraid                | 60.0  |
|                             | 62_10yoF_front1              | Neutral               | 85.0  |
|                             | 62_10yoF_front2              | Neutral               | 90.0  |
|                             | 62_10yoF_HappyNoTeeth_front1 | Content               | 95.0  |
|                             | 62_10yoF_HappyNoTeeth_front2 | Content               | 85.0  |
|                             | 62_10yoF_HappyTeeth_front1   | Happy                 | 90.0  |
|                             | 62_10yoF_HappyTeeth_front2   | Happy                 | 95.0  |
|                             | 62_10yoF_Sad_front1          | Sad                   | 90.0  |
|                             | 62_10yoF_Sad_front2          | Sad                   | 95.0  |
|                             | 62_10yoF_Surprise_front1     | Surprised             | 70.0  |

| Males    |          |                     |            |
|----------|----------|---------------------|------------|
| Model ID | Image ID | Intended Expression | Rating (%) |

|            |                              |           |       |
|------------|------------------------------|-----------|-------|
| 48 cont... | 48_11yoM_front2              | Neutral   | 95.0  |
|            | 48_11yoM_HappyNoTeeth_front2 | Content   | 95.0  |
|            | 48_11yoM_HappyNoTeeth        | Content   | 100.0 |
|            | 48_11yoM_HappyTeeth_front2   | Happy     | 100.0 |
|            | 48_11yoM_HappyTeeth          | Happy     | 100.0 |
|            | 48_11yom_sad_front2          | Sad       | 95.0  |
|            | 48_11yom_sad                 | Sad       | 95.0  |
| 49         | 49_8y_surprise_front2        | Surprised | 85.0  |
|            | 49_8y_surprise               | Surprised | 90.0  |
|            | 49_8yoM_Angry_front2         | Angry     | 60.0  |
|            | 49_8yoM_Angry                | Angry     | 55.0  |
|            | 49_8yoM_disgust_front2       | Disgusted | 35.0  |
|            | 49_8yoM_disgust              | Disgusted | 30.0  |
|            | 49_8yoM_Fear_front2          | Afraid    | 55.0  |
|            | 49_8yoM_Fear                 | Afraid    | 60.0  |
|            | 49_8yoM                      | Neutral   | 95.0  |
|            | 49_8yoM_front2               | Neutral   | 95.0  |
|            | 49_8yoM_HappyNoTeeth_front2  | Content   | 100.0 |
|            | 49_8yoM_HappyNoTeeth         | Content   | 100.0 |
|            | 49_8yoM_HappyTeeth_front2    | Happy     | 100.0 |
|            | 49_8yoM_HappyTeeth           | Happy     | 95.0  |
|            | 49_8yom_sad_front2           | Sad       | 90.0  |
|            | 49_8yom_sad                  | Sad       | 85.0  |
| 51         | 51_11y_surprise_front2       | Surprised | 40.0  |
|            | 51_11y_surprise              | Surprised | 55.0  |
|            | 51_11yoM_Angry_front2        | Angry     | 75.0  |
|            | 51_11yoM_Angry               | Angry     | 75.0  |
|            | 51_11yoM_disgust_front2      | Disgusted | 85.0  |
|            | 51_11yoM_disgust             | Disgusted | 80.0  |
|            | 51_11yoM_Fear_front2         | Afraid    | 90.0  |
|            | 51_11yoM_Fear                | Afraid    | 70.0  |
|            | 51_11yoM                     | Neutral   | 90.0  |
|            | 51_11yoM_front2              | Neutral   | 90.0  |
|            | 51_11yoM_HappyNoTeeth_front2 | Content   | 100.0 |
|            | 51_11yoM_HappyNoTeeth        | Content   | 100.0 |
|            | 51_11yoM_HappyTeeth_front2   | Happy     | 100.0 |
|            | 51_11yoM_HappyTeeth          | Happy     | 100.0 |
|            | 51_11yom_sad_front2          | Sad       | 100.0 |
|            | 51_11yom_sad                 | Sad       | 75.0  |
| 53         | 53_8y_surprise_front2        | Surprised | 55.0  |
|            | 53_8y_surprise               | Surprised | 50.0  |

| Females  |          |                     |            |
|----------|----------|---------------------|------------|
| Model ID | Image ID | Intended Expression | Rating (%) |

|                    |                              |           |       |
|--------------------|------------------------------|-----------|-------|
| 62 cont...         | 62_10yoF_Surprise_front2     | Surprised | 75.0  |
| 64                 | 64_10yoF_Angry_front1        | Angry     | 90.0  |
|                    | 64_10yoF_Angry_front2        | Angry     | 95.0  |
|                    | 64_10yoF_Disgust_front1      | Disgusted | 85.0  |
|                    | 64_10yoF_Disgust_front2      | Disgusted | 95.0  |
|                    | 64_10yoF_Fear_front1         | Afraid    | 30.0  |
|                    | 64_10yoF_Fear_front2         | Afraid    | 15.0  |
|                    | 64_10yoF_front1              | Neutral   | 75.0  |
|                    | 64_10yoF_front2              | Neutral   | 85.0  |
|                    | 64_10yoF_HappyNoTeeth_front1 | Content   | 100.0 |
|                    | 64_10yoF_HappyNoTeeth_front2 | Content   | 95.0  |
|                    | 64_10yoF_HappyTeeth_front1   | Happy     | 90.0  |
|                    | 64_10yoF_HappyTeeth_front2   | Happy     | 95.0  |
|                    | 64_10yoF_Sad_front1          | Sad       | 95.0  |
|                    | 64_10yoF_Sad_front2          | Sad       | 95.0  |
| 65                 | 64_10yoF_Surprise_front1     | Surprised | 80.0  |
|                    | 64_10yoF_Surprise_front2     | Surprised | 70.0  |
|                    | 65_8yoF_Angry_front1         | Angry     | 65.0  |
|                    | 65_8yoF_Angry_front2         | Angry     | 70.0  |
|                    | 65_8yoF_Disgust_front1       | Disgusted | 85.0  |
|                    | 65_8yoF_Disgust_front2       | Disgusted | 80.0  |
|                    | 65_8yoF_Fear_front1          | Afraid    | 50.0  |
|                    | 65_8yoF_Fear_front2          | Afraid    | 45.0  |
|                    | 65_8yoF_front1               | Neutral   | 65.0  |
|                    | 65_8yoF_front2               | Neutral   | 95.0  |
|                    | 65_8yoF_HappyNoTeeth_front1  | Content   | 90.0  |
|                    | 65_8yoF_HappyNoTeeth_front2  | Content   | 100.0 |
|                    | 65_8yoF_HappyTeeth_front1    | Happy     | 95.0  |
|                    | 65_8yoF_HappyTeeth_front2    | Happy     | 95.0  |
| 65_8yoF_Sad_front1 | Sad                          | 95.0      |       |
| 65_8yoF_Sad_front2 | Sad                          | 70.0      |       |
| 69                 | 65_8yoF_Surprise_front1      | Surprised | 80.0  |
|                    | 65_8yoF_Surprise_front2      | Surprised | 80.0  |
|                    | 69_7yoF_Angry_front1         | Angry     | 65.0  |
|                    | 69_7yoF_Angry_front2         | Angry     | 60.0  |
|                    | 69_7yoF_Disgust_front1       | Disgusted | 85.0  |
|                    | 69_7yoF_Disgust_front2       | Disgusted | 80.0  |
|                    | 69_7yoF_Fear_front1          | Afraid    | 30.0  |
|                    | 69_7yoF_Fear_front2          | Afraid    | 5.0   |
|                    | 69_7yoF_front1               | Neutral   | 90.0  |
|                    | 69_7yoF_front2               | Neutral   | 90.0  |

| Males    |          |                     |            |
|----------|----------|---------------------|------------|
| Model ID | Image ID | Intended Expression | Rating (%) |

|                             |                             |                       |           |
|-----------------------------|-----------------------------|-----------------------|-----------|
| 53 cont...                  | 53_8yoM_Angry_front2        | Angry                 | 35.0      |
|                             | 53_8yoM_Angry               | Angry                 | 5.0       |
|                             | 53_8yoM_disgust_front2      | Disgusted             | 90.0      |
|                             | 53_8yoM_disgust             | Disgusted             | 85.0      |
|                             | 53_8yoM_Fear_front2         | Afraid                | 65.0      |
|                             | 53_8yoM_Fear                | Afraid                | 70.0      |
|                             | 53_8yoM                     | Neutral               | 90.0      |
|                             | 53_8yoM_front2              | Neutral               | 90.0      |
|                             | 53_8yoM_HappyNoTeeth_front2 | Content               | 95.0      |
|                             | 53_8yoM_HappyNoTeeth        | Content               | 100.0     |
|                             | 53_8yoM_HappyTeeth_front2   | Happy                 | 100.0     |
|                             | 53_8yoM_HappyTeeth          | Happy                 | 100.0     |
|                             | 53_8yom_sad_front2          | Sad                   | 90.0      |
|                             | 53_8yom_sad                 | Sad                   | 100.0     |
|                             | 56                          | 56_8y_surprise_front2 | Surprised |
| 56_8y_surprise              |                             | Surprised             | 90.0      |
| 56_8yoM_Angry_front2        |                             | Angry                 | 85.0      |
| 56_8yoM_Angry               |                             | Angry                 | 100.0     |
| 56_8yoM_disgust_front2      |                             | Disgusted             | 50.0      |
| 56_8yoM_disgust             |                             | Disgusted             | 80.0      |
| 56_8yoM_Fear_front2         |                             | Afraid                | 45.0      |
| 56_8yoM_Fear                |                             | Afraid                | 55.0      |
| 56_8yoM                     |                             | Neutral               | 95.0      |
| 56_8yoM_front2              |                             | Neutral               | 90.0      |
| 56_8yoM_HappyNoTeeth_front2 |                             | Content               | 35.0      |
| 56_8yoM_HappyNoTeeth        |                             | Content               | 50.0      |
| 56_8yoM_HappyTeeth_front2   |                             | Happy                 | 100.0     |
| 56_8yoM_HappyTeeth          |                             | Happy                 | 100.0     |
| 56_8yom_sad_front2          |                             | Sad                   | 90.0      |
| 56_8yom_sad                 | Sad                         | 85.0                  |           |
| 58                          | 58_8y_surprise_front2       | Surprised             | 45.0      |
|                             | 58_8y_surprise              | Surprised             | 55.0      |
|                             | 58_8yoM_Angry_front2        | Angry                 | 60.0      |
|                             | 58_8yoM_Angry               | Angry                 | 65.0      |
|                             | 58_8yoM_disgust_front2      | Disgusted             | 75.0      |
|                             | 58_8yoM_disgust             | Disgusted             | 75.0      |
|                             | 58_8yoM_Fear_front2         | Afraid                | 30.0      |
|                             | 58_8yoM_Fear                | Afraid                | 40.0      |
|                             | 58_8yoM                     | Neutral               | 85.0      |
|                             | 58_8yoM_front2              | Neutral               | 80.0      |
|                             | 58_8yoM_HappyNoTeeth_front2 | Content               | 95.0      |

| Females  |          |                     |            |
|----------|----------|---------------------|------------|
| Model ID | Image ID | Intended Expression | Rating (%) |

|                             |                             |                      |       |
|-----------------------------|-----------------------------|----------------------|-------|
| 69 cont...                  | 69_7yoF_HappyNoTeeth_front1 | Content              | 100.0 |
|                             | 69_7yoF_HappyNoTeeth_front2 | Content              | 95.0  |
|                             | 69_7yoF_HappyTeeth_front1   | Happy                | 100.0 |
|                             | 69_7yoF_HappyTeeth_front2   | Happy                | 100.0 |
|                             | 69_7yoF_Sad_front1          | Sad                  | 100.0 |
|                             | 69_7yoF_Sad_front2          | Sad                  | 95.0  |
|                             | 69_7yoF_Surprise_front1     | Surprised            | 70.0  |
|                             | 69_7yoF_Surprise_front2     | Surprised            | 80.0  |
|                             | 71                          | 71_9yoF_Angry_front1 | Angry |
| 71_9yoF_Angry_front2        |                             | Angry                | 15.0  |
| 71_9yoF_Disgust_front1      |                             | Disgusted            | 85.0  |
| 71_9yoF_Disgust_front2      |                             | Disgusted            | 80.0  |
| 71_9yoF_Fear_front1         |                             | Afraid               | 55.0  |
| 71_9yoF_Fear_front2         |                             | Afraid               | 80.0  |
| 71_9yoF_front1              |                             | Neutral              | 90.0  |
| 71_9yoF_front2              |                             | Neutral              | 95.0  |
| 71_9yoF_HappyNoTeeth_front1 |                             | Content              | 100.0 |
| 71_9yoF_HappyNoTeeth_front2 |                             | Content              | 100.0 |
| 71_9yoF_HappyTeeth_front1   |                             | Happy                | 100.0 |
| 71_9yoF_HappyTeeth_front2   |                             | Happy                | 100.0 |
| 71_9yoF_Sad_front1          |                             | Sad                  | 85.0  |
| 71_9yoF_Sad_front2          | Sad                         | 90.0                 |       |
| 71_9yoF_Surprise_front1     | Surprised                   | 45.0                 |       |
| 71_9yoF_Surprise_front2     | Surprised                   | 55.0                 |       |
| 74                          | 74_8yoF_Angry_front1        | Angry                | 85.0  |
|                             | 74_8yoF_Angry_front2        | Angry                | 80.0  |
|                             | 74_8yoF_Disgust_front1      | Disgusted            | 85.0  |
|                             | 74_8yoF_Disgust_front2      | Disgusted            | 65.0  |
|                             | 74_8yoF_Fear_front1         | Afraid               | 5.0   |
|                             | 74_8yoF_Fear_front2         | Afraid               | 15.0  |
|                             | 74_8yoF_front1              | Neutral              | 95.0  |
|                             | 74_8yoF_front2              | Neutral              | 95.0  |
|                             | 74_8yoF_HappyNoTeeth_front1 | Content              | 90.0  |
|                             | 74_8yoF_HappyNoTeeth_front2 | Content              | 100.0 |
|                             | 74_8yoF_HappyTeeth_front1   | Happy                | 95.0  |
|                             | 74_8yoF_HappyTeeth_front2   | Happy                | 95.0  |
|                             | 74_8yoF_Sad_front1          | Sad                  | 55.0  |
| 74_8yoF_Sad_front2          | Sad                         | 50.0                 |       |
| 74_8yoF_Surprise_front1     | Surprised                   | 85.0                 |       |
| 74_8yoF_Surprise_front2     | Surprised                   | 90.0                 |       |
| 77                          | 77_10yoF_Angry_front1       | Angry                | 40.0  |



| Males    |          |                     |            |
|----------|----------|---------------------|------------|
| Model ID | Image ID | Intended Expression | Rating (%) |

|            |                             |           |       |
|------------|-----------------------------|-----------|-------|
| 58 cont... | 58_8yoM_HappyNoTeeth        | Content   | 90.0  |
|            | 58_8yoM_HappyTeeth_front2   | Happy     | 100.0 |
|            | 58_8yoM_HappyTeeth          | Happy     | 95.0  |
|            | 58_8yom_sad_front2          | Sad       | 100.0 |
|            | 58_8yom_sad                 | Sad       | 95.0  |
| 59         | 59_8y_surprise_front2       | Surprised | 80.0  |
|            | 59_8y_surprise              | Surprised | 80.0  |
|            | 59_8yoM_Angry_front2        | Angry     | 70.0  |
|            | 59_8yoM_Angry               | Angry     | 55.0  |
|            | 59_8yoM_disgust_front2      | Disgusted | 40.0  |
|            | 59_8yoM_disgust             | Disgusted | 30.0  |
|            | 59_8yoM_Fear_front2         | Afraid    | 85.0  |
|            | 59_8yoM_Fear                | Afraid    | 85.0  |
|            | 59_8yoM                     | Neutral   | 100.0 |
|            | 59_8yoM_front2              | Neutral   | 100.0 |
|            | 59_8yoM_HappyNoTeeth_front2 | Content   | 75.0  |
|            | 59_8yoM_HappyNoTeeth        | Content   | 90.0  |
|            | 59_8yoM_HappyTeeth_front2   | Happy     | 100.0 |
|            | 59_8yoM_HappyTeeth          | Happy     | 95.0  |
|            | 59_8yom_sad_front2          | Sad       | 100.0 |
|            | 59_8yom_sad                 | Sad       | 100.0 |
| 60         | 60_7y_surprise_front2       | Surprised | 55.0  |
|            | 60_7y_surprise              | Surprised | 70.0  |
|            | 60_7yoM_Angry_front2        | Angry     | 95.0  |
|            | 60_7yoM_Angry               | Angry     | 90.0  |
|            | 60_7yoM_disgust_front2      | Disgusted | 75.0  |
|            | 60_7yoM_disgust             | Disgusted | 80.0  |
|            | 60_7yoM_Fear_front2         | Afraid    | 75.0  |
|            | 60_7yoM_Fear                | Afraid    | 75.0  |
|            | 60_7yoM                     | Neutral   | 95.0  |
|            | 60_7yoM_front2              | Neutral   | 95.0  |
|            | 60_7yoM_HappyNoTeeth_front2 | Content   | 85.0  |
|            | 60_7yoM_HappyNoTeeth        | Content   | 80.0  |
|            | 60_7yoM_HappyTeeth_front2   | Happy     | 90.0  |
|            | 60_7yoM_HappyTeeth          | Happy     | 100.0 |
|            | 60_7yom_sad_front2          | Sad       | 100.0 |
|            | 60_7yom_sad                 | Sad       | 100.0 |
| 63         | 63_10y_surprise_front2      | Surprised | 80.0  |
|            | 63_10y_surprise             | Surprised | 90.0  |
|            | 63_10yoM_Angry_front2       | Angry     | 70.0  |
|            | 63_10yoM_Angry              | Angry     | 65.0  |

| Females  |          |                     |            |
|----------|----------|---------------------|------------|
| Model ID | Image ID | Intended Expression | Rating (%) |

|                              |                              |                      |       |
|------------------------------|------------------------------|----------------------|-------|
| 77 cont...                   | 77_10yoF_Angry_front2        | Angry                | 50.0  |
|                              | 77_10yoF_Disgust_front1      | Disgusted            | 85.0  |
|                              | 77_10yoF_Disgust_front2      | Disgusted            | 85.0  |
|                              | 77_10yoF_Fear_front1         | Afraid               | 50.0  |
|                              | 77_10yoF_Fear_front2         | Afraid               | 75.0  |
|                              | 77_10yoF_front1              | Neutral              | 95.0  |
|                              | 77_10yoF_front2              | Neutral              | 95.0  |
|                              | 77_10yoF_HappyNoTeeth_front1 | Content              | 100.0 |
|                              | 77_10yoF_HappyNoTeeth_front2 | Content              | 100.0 |
|                              | 77_10yoF_HappyTeeth_front1   | Happy                | 95.0  |
|                              | 77_10yoF_HappyTeeth_front2   | Happy                | 100.0 |
|                              | 77_10yoF_Sad_front1          | Sad                  | 95.0  |
|                              | 77_10yoF_Sad_front2          | Sad                  | 100.0 |
|                              | 77_10yoF_Surprise_front1     | Surprised            | 95.0  |
|                              | 77_10yoF_Surprise_front2     | Surprised            | 100.0 |
|                              | 78                           | 78_9yoF_Angry_front1 | Angry |
| 78_9yoF_Angry_front2         |                              | Angry                | 85.0  |
| 78_9yoF_Disgust_front1       |                              | Disgusted            | 70.0  |
| 78_9yoF_Disgust_front2       |                              | Disgusted            | 65.0  |
| 78_9yoF_Fear_front1          |                              | Afraid               | 5.0   |
| 78_9yoF_Fear_front2          |                              | Afraid               | 10.0  |
| 78_9yoF_front1               |                              | Neutral              | 60.0  |
| 78_9yoF_front2               |                              | Neutral              | 75.0  |
| 78_9yoF_HappyNoTeeth_front1  |                              | Content              | 100.0 |
| 78_9yoF_HappyNoTeeth_front2  |                              | Content              | 100.0 |
| 78_9yoF_HappyTeeth_front1    |                              | Happy                | 95.0  |
| 78_9yoF_HappyTeeth_front2    |                              | Happy                | 90.0  |
| 78_9yoF_Sad_front1           | Sad                          | 85.0                 |       |
| 78_9yoF_Sad_front2           | Sad                          | 95.0                 |       |
| 78_9yoF_Surprise_front1      | Surprised                    | 90.0                 |       |
| 78_9yoF_Surprise_front2      | Surprised                    | 95.0                 |       |
| 88                           | 88_12yoF_Angry_front1        | Angry                | 55.0  |
|                              | 88_12yoF_Angry_front2        | Angry                | 70.0  |
|                              | 88_12yoF_Disgust_front1      | Disgusted            | 65.0  |
|                              | 88_12yoF_Disgust_front2      | Disgusted            | 70.0  |
|                              | 88_12yoF_Fear_front1         | Afraid               | 10.0  |
|                              | 88_12yoF_Fear_front2         | Afraid               | 20.0  |
|                              | 88_12yoF_front1              | Neutral              | 95.0  |
|                              | 88_12yoF_front2              | Neutral              | 95.0  |
| 88_12yoF_HappyNoTeeth_front1 | Content                      | 100.0                |       |
| 88_12yoF_HappyNoTeeth_front2 | Content                      | 100.0                |       |

| Males    |          |                     |            |
|----------|----------|---------------------|------------|
| Model ID | Image ID | Intended Expression | Rating (%) |

|                             |                              |                       |           |      |
|-----------------------------|------------------------------|-----------------------|-----------|------|
| 63<br>cont...               | 63_10yoM_disgust_front2      | Disgusted             | 65.0      |      |
|                             | 63_10yoM_disgust             | Disgusted             | 65.0      |      |
|                             | 63_10yoM_Fear_front2         | Afraid                | 35.0      |      |
|                             | 63_10yoM_Fear                | Afraid                | 25.0      |      |
|                             | 63_10yoM                     | Neutral               | 95.0      |      |
|                             | 63_10yoM_front2              | Neutral               | 95.0      |      |
|                             | 63_10yoM_HappyNoTeeth_front2 | Content               | 75.0      |      |
|                             | 63_10yoM_HappyNoTeeth        | Content               | 70.0      |      |
|                             | 63_10yoM_HappyTeeth_front2   | Happy                 | 100.0     |      |
|                             | 63_10yoM_HappyTeeth          | Happy                 | 100.0     |      |
|                             | 63_10yom_sad_front2          | Sad                   | 85.0      |      |
|                             | 63_10yom_sad                 | Sad                   | 90.0      |      |
|                             | 66                           | 66_8y_surprise_front2 | Surprised | 75.0 |
|                             |                              | 66_8y_surprise        | Surprised | 70.0 |
| 66_8yoM_Angry_front2        |                              | Angry                 | 20.0      |      |
| 66_8yoM_Angry               |                              | Angry                 | 25.0      |      |
| 66_8yoM_disgust_front2      |                              | Disgusted             | 45.0      |      |
| 66_8yoM_disgust             |                              | Disgusted             | 50.0      |      |
| 66_8yoM_Fear_front2         |                              | Afraid                | 40.0      |      |
| 66_8yoM_Fear                |                              | Afraid                | 65.0      |      |
| 66_8yoM                     |                              | Neutral               | 85.0      |      |
| 66_8yoM_front2              |                              | Neutral               | 90.0      |      |
| 66_8yoM_HappyNoTeeth_front2 |                              | Content               | 85.0      |      |
| 66_8yoM_HappyNoTeeth        |                              | Content               | 100.0     |      |
| 66_8yoM_HappyTeeth_front2   |                              | Happy                 | 100.0     |      |
| 66_8yoM_HappyTeeth          |                              | Happy                 | 100.0     |      |
| 66_8yom_sad_front2          |                              | Sad                   | 90.0      |      |
| 66_8yom_sad                 |                              | Sad                   | 80.0      |      |
| 68                          | 68_9y_surprise_front2        | Surprised             | 85.0      |      |
|                             | 68_9y_surprise               | Surprised             | 90.0      |      |
|                             | 68_9yoM_Angry_front2         | Angry                 | 65.0      |      |
|                             | 68_9yoM_Angry                | Angry                 | 70.0      |      |
|                             | 68_9yoM_disgust_front2       | Disgusted             | 85.0      |      |
|                             | 68_9yoM_disgust              | Disgusted             | 25.0      |      |
|                             | 68_9yoM_Fear_front2          | Afraid                | 50.0      |      |
|                             | 68_9yoM_Fear                 | Afraid                | 50.0      |      |
|                             | 68_9yoM                      | Neutral               | 100.0     |      |
|                             | 68_9yoM_front2               | Neutral               | 100.0     |      |
|                             | 68_9yoM_HappyNoTeeth_front2  | Content               | 95.0      |      |
|                             | 68_9yoM_HappyNoTeeth         | Content               | 95.0      |      |
|                             | 68_9yoM_HappyTeeth_front2    | Happy                 | 95.0      |      |

| Females  |          |                     |            |
|----------|----------|---------------------|------------|
| Model ID | Image ID | Intended Expression | Rating (%) |

|                             |                              |                      |       |      |
|-----------------------------|------------------------------|----------------------|-------|------|
| 88<br>cont...               | 88_12yoF_HappyTeeth_front1   | Happy                | 95.0  |      |
|                             | 88_12yoF_HappyTeeth_front2   | Happy                | 95.0  |      |
|                             | 88_12yoF_Sad_front1          | Sad                  | 85.0  |      |
|                             | 88_12yoF_Sad_front2          | Sad                  | 80.0  |      |
|                             | 88_12yoF_Surprise_front1     | Surprised            | 90.0  |      |
|                             | 88_12yoF_Surprise_front2     | Surprised            | 85.0  |      |
|                             | 94                           | 94_7yoF_Angry_front1 | Angry | 75.0 |
|                             |                              | 94_7yoF_Angry_front2 | Angry | 70.0 |
| 94_7yoF_Disgust_front1      |                              | Disgusted            | 50.0  |      |
| 94_7yoF_Disgust_front2      |                              | Disgusted            | 15.0  |      |
| 94_7yoF_Fear_front1         |                              | Afraid               | 25.0  |      |
| 94_7yoF_Fear_front2         |                              | Afraid               | 60.0  |      |
| 94_7yoF_front1              |                              | Neutral              | 90.0  |      |
| 94_7yoF_front2              |                              | Neutral              | 60.0  |      |
| 94_7yoF_HappyNoTeeth_front1 |                              | Content              | 100.0 |      |
| 94_7yoF_HappyNoTeeth_front2 |                              | Content              | 95.0  |      |
| 94_7yoF_HappyTeeth_front1   |                              | Happy                | 90.0  |      |
| 94_7yoF_HappyTeeth_front2   |                              | Happy                | 100.0 |      |
| 94_7yoF_Sad_front1          |                              | Sad                  | 100.0 |      |
| 94_7yoF_Sad_front2          |                              | Sad                  | 95.0  |      |
| 94_7yoF_Surprise_front1     |                              | Surprised            | 95.0  |      |
| 94_7yoF_Surprise_front2     |                              | Surprised            | 70.0  |      |
| 96                          | 96_12yoF_Angry_front1        | Angry                | 70.0  |      |
|                             | 96_12yoF_Angry_front2        | Angry                | 75.0  |      |
|                             | 96_12yoF_Disgust_front1      | Disgusted            | 90.0  |      |
|                             | 96_12yoF_Disgust_front2      | Disgusted            | 90.0  |      |
|                             | 96_12yoF_Fear_front1         | Afraid               | 60.0  |      |
|                             | 96_12yoF_Fear_front2         | Afraid               | 55.0  |      |
|                             | 96_12yoF_front               | Neutral              | 95.0  |      |
|                             | 96_12yoF_HappyNoTeeth_front1 | Content              | 100.0 |      |
|                             | 96_12yoF_HappyNoTeeth_front2 | Content              | 100.0 |      |
|                             | 96_12yoF_HappyTeeth_front1   | Happy                | 100.0 |      |
|                             | 96_12yoF_HappyTeeth_front2   | Happy                | 95.0  |      |
|                             | 96_12yoF_Sad_front1          | Sad                  | 95.0  |      |
|                             | 96_12yoF_Sad_front2          | Sad                  | 100.0 |      |
|                             | 96_12yoF_Surprise_front1     | Surprised            | 55.0  |      |
| 96_12yoF_Surprise_front2    | Surprised                    | 65.0                 |       |      |
| 98                          | 98_9yoF_Angry_front1         | Angry                | 75.0  |      |
|                             | 98_9yoF_Angry_front2         | Angry                | 80.0  |      |
|                             | 98_9yoF_Disgust_front1       | Disgusted            | 95.0  |      |
|                             | 98_9yoF_Disgust_front2       | Disgusted            | 100.0 |      |

| Males    |          |                     |            |
|----------|----------|---------------------|------------|
| Model ID | Image ID | Intended Expression | Rating (%) |

|                              |                             |                        |           |
|------------------------------|-----------------------------|------------------------|-----------|
| 68 cont...                   | 68_9yoM_HappyTeeth          | Happy                  | 95.0      |
|                              | 68_9yom_sad_front2          | Sad                    | 95.0      |
|                              | 68_9yom_sad                 | Sad                    | 100.0     |
| 70                           | 70_8y_surprise_front2       | Surprised              | 80.0      |
|                              | 70_8y_surprise              | Surprised              | 75.0      |
|                              | 70_8yoM_Angry_front2        | Angry                  | 95.0      |
|                              | 70_8yoM_Angry               | Angry                  | 90.0      |
|                              | 70_8yoM_disgust_front2      | Disgusted              | 50.0      |
|                              | 70_8yoM_disgust             | Disgusted              | 70.0      |
|                              | 70_8yoM_Fear_front2         | Afraid                 | 20.0      |
|                              | 70_8yoM_Fear                | Afraid                 | 45.0      |
|                              | 70_8yoM                     | Neutral                | 95.0      |
|                              | 70_8yoM_front2              | Neutral                | 95.0      |
|                              | 70_8yoM_HappyNoTeeth_front2 | Content                | 100.0     |
|                              | 70_8yoM_HappyNoTeeth        | Content                | 85.0      |
|                              | 70_8yoM_HappyTeeth_front2   | Happy                  | 100.0     |
|                              | 70_8yoM_HappyTeeth          | Happy                  | 95.0      |
|                              | 70_8yom_sad_front2          | Sad                    | 95.0      |
|                              | 70_8yom_sad                 | Sad                    | 95.0      |
|                              | 72                          | 72_10y_surprise_front2 | Surprised |
| 72_10y_surprise              |                             | Surprised              | 90.0      |
| 72_10yoM_Angry_front2        |                             | Angry                  | 85.0      |
| 72_10yoM_Angry               |                             | Angry                  | 75.0      |
| 72_10yoM_disgust_front2      |                             | Disgusted              | 95.0      |
| 72_10yoM_disgust             |                             | Disgusted              | 95.0      |
| 72_10yoM_Fear_front2         |                             | Afraid                 | 55.0      |
| 72_10yoM_Fear                |                             | Afraid                 | 55.0      |
| 72_10yoM                     |                             | Neutral                | 95.0      |
| 72_10yoM_front2              |                             | Neutral                | 90.0      |
| 72_10yoM_HappyNoTeeth_front2 |                             | Content                | 100.0     |
| 72_10yoM_HappyNoTeeth        |                             | Content                | 100.0     |
| 72_10yoM_HappyTeeth_front2   |                             | Happy                  | 100.0     |
| 72_10yoM_HappyTeeth          |                             | Happy                  | 100.0     |
| 72_10yom_sad_front2          |                             | Sad                    | 95.0      |
| 72_10yom_sad                 |                             | Sad                    | 95.0      |
| 73                           |                             | 73_8y_surprise_front2  | Surprised |
|                              | 73_8y_surprise              | Surprised              | 35.0      |
|                              | 73_8yoM_Angry_front2        | Angry                  | 90.0      |
|                              | 73_8yoM_Angry               | Angry                  | 80.0      |
|                              | 73_8yoM_disgust_front2      | Disgusted              | 55.0      |
|                              | 73_8yoM_disgust             | Disgusted              | 50.0      |

| Females  |          |                     |            |
|----------|----------|---------------------|------------|
| Model ID | Image ID | Intended Expression | Rating (%) |

|                             |                              |                      |       |      |
|-----------------------------|------------------------------|----------------------|-------|------|
| 98 cont...                  | 98_9yoF_Fear_front1          | Afraid               | 45.0  |      |
|                             | 98_9yoF_Fear_front2          | Afraid               | 35.0  |      |
|                             | 98_9yoF_front1               | Neutral              | 85.0  |      |
|                             | 98_9yoF_front2               | Neutral              | 85.0  |      |
|                             | 98_9yoF_HappyNoTeeth_front1  | Content              | 80.0  |      |
|                             | 98_9yoF_HappyNoTeeth_front2  | Content              | 90.0  |      |
|                             | 98_9yoF_HappyTeeth_front1    | Happy                | 100.0 |      |
|                             | 98_9yoF_HappyTeeth_front2    | Happy                | 95.0  |      |
|                             | 98_9yoF_Sad_front1           | Sad                  | 95.0  |      |
|                             | 98_9yoF_Sad_front2           | Sad                  | 65.0  |      |
|                             | 98_9yoF_Surprise_front1      | Surprised            | 75.0  |      |
|                             | 98_9yoF_Surprise_front2      | Surprised            | 85.0  |      |
|                             | 99                           | 99_7yoF_Angry_front1 | Angry | 85.0 |
|                             |                              | 99_7yoF_Angry_front2 | Angry | 85.0 |
| 99_7yoF_Disgust_front1      |                              | Disgusted            | 65.0  |      |
| 99_7yoF_Disgust_front2      |                              | Disgusted            | 70.0  |      |
| 99_7yoF_Fear_front1         |                              | Afraid               | 70.0  |      |
| 99_7yoF_Fear_front2         |                              | Afraid               | 30.0  |      |
| 99_7yoF_front1              |                              | Neutral              | 95.0  |      |
| 99_7yoF_front2              |                              | Neutral              | 90.0  |      |
| 99_7yoF_HappyNoTeeth_front1 |                              | Content              | 90.0  |      |
| 99_7yoF_HappyNoTeeth_front2 |                              | Content              | 90.0  |      |
| 99_7yoF_HappyTeeth_front1   |                              | Happy                | 100.0 |      |
| 99_7yoF_HappyTeeth_front2   |                              | Happy                | 95.0  |      |
| 99_7yoF_Sad_front1          |                              | Sad                  | 30.0  |      |
| 99_7yoF_Sad_front2          |                              | Sad                  | 65.0  |      |
| 99_7yoF_Surprise_front1     | Surprised                    | 85.0                 |       |      |
| 99_7yoF_Surprise_front2     | Surprised                    | 100.0                |       |      |
| 102                         | 102_9yoF_Angry_front1        | Angry                | 25.0  |      |
|                             | 102_9yoF_Disgust_front2      | Disgusted            | 100.0 |      |
|                             | 102_9yoF_Disgust_front1      | Disgusted            | 85.0  |      |
|                             | 102_9yoF_Fear_front1         | Afraid               | 35.0  |      |
|                             | 102_9yoF_Fear_front2         | Afraid               | 30.0  |      |
|                             | 102_9yoF_front1              | Neutral              | 95.0  |      |
|                             | 102_9yoF_front2              | Neutral              | 95.0  |      |
|                             | 102_9yoF_HappyNoTeeth_front1 | Content              | 100.0 |      |
|                             | 102_9yoF_HappyNoTeeth_front2 | Content              | 95.0  |      |
|                             | 102_9yoF_HappyTeeth_front1   | Happy                | 100.0 |      |
|                             | 102_9yoF_HappyTeeth_front2   | Happy                | 85.0  |      |
|                             | 102_9yoF_Sad_front1          | Sad                  | 55.0  |      |
| 102_9yoF_Sad_front2         | Sad                          | 35.0                 |       |      |

| Males    |          |                     |            |
|----------|----------|---------------------|------------|
| Model ID | Image ID | Intended Expression | Rating (%) |

|               |                              |           |       |
|---------------|------------------------------|-----------|-------|
| 73<br>cont... | 73_8yoM_Fear_front2          | Afraid    | 25.0  |
|               | 73_8yoM_Fear                 | Afraid    | 45.0  |
|               | 73_8yoM                      | Neutral   | 95.0  |
|               | 73_8yoM_front2               | Neutral   | 95.0  |
|               | 73_8yoM_HappyNoTeeth_front2  | Content   | 95.0  |
|               | 73_8yoM_HappyNoTeeth         | Content   | 90.0  |
|               | 73_8yoM_HappyTeeth_front2    | Happy     | 100.0 |
|               | 73_8yoM_HappyTeeth           | Happy     | 100.0 |
|               | 73_8yom_sad_front2           | Sad       | 100.0 |
|               | 73_8yom_sad                  | Sad       | 95.0  |
| 75            | 75_10y_surprise_front2       | Surprised | 95.0  |
|               | 75_10y_surprise              | Surprised | 85.0  |
|               | 75_10yoM_Angry_front2        | Angry     | 55.0  |
|               | 75_10yoM_Angry               | Angry     | 40.0  |
|               | 75_10yoM_disgust_front2      | Disgusted | 80.0  |
|               | 75_10yoM_disgust             | Disgusted | 90.0  |
|               | 75_10yoM_Fear_front2         | Afraid    | 30.0  |
|               | 75_10yoM_Fear                | Afraid    | 35.0  |
|               | 75_10yoM                     | Neutral   | 100.0 |
|               | 75_10yoM_front2              | Neutral   | 100.0 |
|               | 75_10yoM_HappyNoTeeth_front2 | Content   | 95.0  |
|               | 75_10yoM_HappyNoTeeth        | Content   | 100.0 |
|               | 75_10yoM_HappyTeeth_front2   | Happy     | 90.0  |
|               | 75_10yoM_HappyTeeth          | Happy     | 90.0  |
|               | 75_10yom_sad_front2          | Sad       | 95.0  |
| 75_10yom_sad  | Sad                          | 95.0      |       |
| 76            | 76_10y_surprise_front2       | Surprised | 90.0  |
|               | 76_10y_surprise              | Surprised | 85.0  |
|               | 76_10yoM_Angry_front2        | Angry     | 65.0  |
|               | 76_10yoM_Angry               | Angry     | 40.0  |
|               | 76_10yoM_disgust_front2      | Disgusted | 50.0  |
|               | 76_10yoM_disgust             | Disgusted | 65.0  |
|               | 76_10yoM_Fear_front2         | Afraid    | 75.0  |
|               | 76_10yoM_Fear                | Afraid    | 65.0  |
|               | 76_10yoM_HappyNoTeeth_front2 | Content   | 100.0 |
|               | 76_10yoM_HappyNoTeeth        | Content   | 100.0 |
|               | 76_10yoM_HappyTeeth_front2   | Happy     | 100.0 |
|               | 76_10yoM_HappyTeeth          | Happy     | 100.0 |
|               | 76_10yom_sad_front2          | Sad       | 95.0  |
|               | 76_10yom_sad                 | Sad       | 95.0  |
|               | 76_8yoM_front2               | Neutral   | 100.0 |

| Females  |          |                     |            |
|----------|----------|---------------------|------------|
| Model ID | Image ID | Intended Expression | Rating (%) |

|                           |                               |           |       |
|---------------------------|-------------------------------|-----------|-------|
| 102<br>cont...            | 102_9yoF_Surprise_front1      | Surprised | 85.0  |
|                           | 102_9yoF_Surprise_front2      | Surprised | 70.0  |
| 105                       | 105_10yoF_Angry_front1        | Angry     | 80.0  |
|                           | 105_10yoF_Angry_front2        | Angry     | 90.0  |
|                           | 105_10yoF_Disgust_front1      | Disgusted | 45.0  |
|                           | 105_10yoF_Disgust_front2      | Disgusted | 85.0  |
|                           | 105_10yoF_Fear_front1         | Afraid    | 80.0  |
|                           | 105_10yoF_Fear_front2         | Afraid    | 70.0  |
|                           | 105_10yoF_front1              | Neutral   | 95.0  |
|                           | 105_10yoF_front2              | Neutral   | 100.0 |
|                           | 105_10yoF_HappyNoTeeth_front1 | Content   | 95.0  |
|                           | 105_10yoF_HappyNoTeeth_front2 | Content   | 100.0 |
|                           | 105_10yoF_HappyTeeth_front1   | Happy     | 100.0 |
|                           | 105_10yoF_HappyTeeth_front2   | Happy     | 95.0  |
|                           | 105_10yoF_Sad_front1          | Sad       | 100.0 |
|                           | 105_10yoF_Sad_front2          | Sad       | 100.0 |
|                           | 105_10yoF_Surprise_front1     | Surprised | 55.0  |
| 105_10yoF_Surprise_front2 | Surprised                     | 45.0      |       |
| 109                       | 109_14yoF_Angry_front1        | Angry     | 70.0  |
|                           | 109_14yoF_Angry_front2        | Angry     | 75.0  |
|                           | 109_14yoF_Disgust_front1      | Disgusted | 95.0  |
|                           | 109_14yoF_Disgust_front2      | Disgusted | 65.0  |
|                           | 109_14yoF_Fear_front1         | Afraid    | 80.0  |
|                           | 109_14yoF_Fear_front2         | Afraid    | 85.0  |
|                           | 109_14yoF_front1              | Neutral   | 65.0  |
|                           | 109_14yoF_front2              | Neutral   | 65.0  |
|                           | 109_14yoF_HappyNoTeeth_front1 | Content   | 95.0  |
|                           | 109_14yoF_HappyNoTeeth_front2 | Content   | 90.0  |
|                           | 109_14yoF_HappyTeeth_front1   | Happy     | 100.0 |
|                           | 109_14yoF_HappyTeeth_front2   | Happy     | 95.0  |
|                           | 109_14yoF_Sad_front1          | Sad       | 95.0  |
|                           | 109_14yoF_Sad_front2          | Sad       | 95.0  |
|                           | 109_14yoF_Surprise_front1     | Surprised | 65.0  |
| 109_14yoF_Surprise_front2 | Surprised                     | 85.0      |       |
| 110                       | 110_13yoF_Angry_front1        | Angry     | 80.0  |
|                           | 110_13yoF_Angry_front2        | Angry     | 95.0  |
|                           | 110_13yoF_Disgust_front1      | Disgusted | 95.0  |
|                           | 110_13yoF_Disgust_front2      | Disgusted | 85.0  |
|                           | 110_13yoF_Fear_front1         | Afraid    | 40.0  |
|                           | 110_13yoF_Fear_front2         | Afraid    | 45.0  |
|                           | 110_13yoF_front1              | Neutral   | 95.0  |

| Males    |          |                     |            |
|----------|----------|---------------------|------------|
| Model ID | Image ID | Intended Expression | Rating (%) |

|                              |                             |                        |           |       |
|------------------------------|-----------------------------|------------------------|-----------|-------|
| 76 cont...                   | 76_8yoM                     | Neutral                | 95.0      |       |
| 79                           | 79_7y_surprise_front2       | Surprised              | 75.0      |       |
|                              | 79_7y_surprise              | Surprised              | 70.0      |       |
|                              | 79_7yoM_Angry_front2        | Angry                  | 85.0      |       |
|                              | 79_7yoM_Angry               | Angry                  | 80.0      |       |
|                              | 79_7yoM_disgust_front2      | Disgusted              | 80.0      |       |
|                              | 79_7yoM_disgust             | Disgusted              | 80.0      |       |
|                              | 79_7yoM_Fear_front2         | Afraid                 | 60.0      |       |
|                              | 79_7yoM_Fear                | Afraid                 | 50.0      |       |
|                              | 79_7yoM                     | Neutral                | 100.0     |       |
|                              | 79_7yoM_front2              | Neutral                | 100.0     |       |
|                              | 79_7yoM_HappyNoTeeth_front2 | Content                | 100.0     |       |
|                              | 79_7yoM_HappyNoTeeth        | Content                | 100.0     |       |
|                              | 79_7yoM_HappyTeeth_front2   | Happy                  | 95.0      |       |
|                              | 79_7yoM_HappyTeeth          | Happy                  | 100.0     |       |
|                              | 79_7yom_sad_front2          | Sad                    | 100.0     |       |
|                              | 79_7yom_sad                 | Sad                    | 100.0     |       |
|                              | 80                          | 80_11y_surprise_front2 | Surprised | 90.0  |
|                              |                             | 80_11y_surprise        | Surprised | 95.0  |
| 80_11yoM_Angry_front2        |                             | Angry                  | 55.0      |       |
| 80_11yoM_Angry               |                             | Angry                  | 60.0      |       |
| 80_11yoM_disgust_front2      |                             | Disgusted              | 95.0      |       |
| 80_11yoM_disgust             |                             | Disgusted              | 95.0      |       |
| 80_11yoM_Fear_front2         |                             | Afraid                 | 35.0      |       |
| 80_11yoM_Fear                |                             | Afraid                 | 30.0      |       |
| 80_11yoM                     |                             | Neutral                | 100.0     |       |
| 80_11yoM_front2              |                             | Neutral                | 95.0      |       |
| 80_11yoM_HappyNoTeeth_front2 |                             | Content                | 85.0      |       |
| 80_11yoM_HappyNoTeeth        |                             | Content                | 100.0     |       |
| 80_11yoM_HappyTeeth_front2   |                             | Happy                  | 100.0     |       |
| 80_11yoM_HappyTeeth          |                             | Happy                  | 100.0     |       |
| 80_11yom_sad_front2          |                             | Sad                    | 80.0      |       |
| 80_11yom_sad                 |                             | Sad                    | 70.0      |       |
| 81                           |                             | 81_8y_surprise_front2  | Surprised | 100.0 |
|                              |                             | 81_8y_surprise         | Surprised | 90.0  |
|                              | 81_8yoM_Angry_front2        | Angry                  | 65.0      |       |
|                              | 81_8yoM_Angry               | Angry                  | 80.0      |       |
|                              | 81_8yoM_disgust_front2      | Disgusted              | 70.0      |       |
|                              | 81_8yoM_disgust             | Disgusted              | 75.0      |       |
|                              | 81_8yoM_Fear_front2         | Afraid                 | 60.0      |       |
|                              | 81_8yoM_Fear                | Afraid                 | 100.0     |       |

| Females  |          |                     |            |
|----------|----------|---------------------|------------|
| Model ID | Image ID | Intended Expression | Rating (%) |

|                               |                               |                        |       |
|-------------------------------|-------------------------------|------------------------|-------|
| 110 cont...                   | 110_13yoF_front2              | Neutral                | 80.0  |
|                               | 110_13yoF_HappyNoTeeth_front1 | Content                | 95.0  |
|                               | 110_13yoF_HappyNoTeeth_front2 | Content                | 90.0  |
|                               | 110_13yoF_HappyTeeth_front1   | Happy                  | 95.0  |
|                               | 110_13yoF_HappyTeeth_front2   | Happy                  | 100.0 |
|                               | 110_13yoF_Sad_front1          | Sad                    | 100.0 |
|                               | 110_13yoF_Sad_front2          | Sad                    | 95.0  |
|                               | 110_13yoF_Surprise_front1     | Surprised              | 85.0  |
|                               | 110_13yoF_Surprise_front2     | Surprised              | 90.0  |
|                               | 111                           | 111_13yoF_Angry_front1 | Angry |
| 111_13yoF_Angry_front2        |                               | Angry                  | 80.0  |
| 111_13yoF_Disgust_front1      |                               | Disgusted              | 80.0  |
| 111_13yoF_Disgust_front2      |                               | Disgusted              | 80.0  |
| 111_13yoF_Disgust_front3      |                               | Disgusted              | 60.0  |
| 111_13yoF_Disgust_front4      |                               | Disgusted              | 75.0  |
| 111_13yoF_Fear_front1         |                               | Afraid                 | 25.0  |
| 111_13yoF_Fear_front2         |                               | Afraid                 | 25.0  |
| 111_13yoF_front1              |                               | Neutral                | 80.0  |
| 111_13yoF_front2              |                               | Neutral                | 70.0  |
| 111_13yoF_HappyNoTeeth_front1 |                               | Content                | 75.0  |
| 111_13yoF_HappyNoTeeth_front2 |                               | Content                | 90.0  |
| 111_13yoF_HappyTeeth_front1   |                               | Happy                  | 100.0 |
| 111_13yoF_HappyTeeth_front2   |                               | Happy                  | 90.0  |
| 111_13yoF_Sad_front1          |                               | Sad                    | 100.0 |
| 111_13yoF_Sad_front2          |                               | Sad                    | 95.0  |
| 111_13yoF_Surprise_front1     |                               | Surprised              | 35.0  |
| 111_13yoF_Surprise_front2     |                               | Surprised              | 55.0  |
| 112                           | 112_11yoF_angry1              | Angry                  | 95.0  |
|                               | 112_11yoF_angry2              | Angry                  | 75.0  |
|                               | 112_11yoF_content1            | Content                | 100.0 |
|                               | 112_11yoF_content2            | Content                | 100.0 |
|                               | 112_11yoF_disgust1            | Disgusted              | 85.0  |
|                               | 112_11yoF_disgust2            | Disgusted              | 90.0  |
|                               | 112_11yoF_fear                | Afraid                 | 85.0  |
|                               | 112_11yoF_fear2               | Afraid                 | 65.0  |
|                               | 112_11yoF_happy1              | Happy                  | 100.0 |
|                               | 112_11yoF_happy2              | Happy                  | 100.0 |
|                               | 112_11yoF_neutral1            | Neutral                | 100.0 |
|                               | 112_11yoF_neutral2            | Neutral                | 80.0  |
| 112_11yoF_sad1                | Sad                           | 100.0                  |       |
| 112_11yoF_sad2                | Sad                           | 90.0                   |       |

| Males    |          |                     |            |
|----------|----------|---------------------|------------|
| Model ID | Image ID | Intended Expression | Rating (%) |

|            |                              |           |       |
|------------|------------------------------|-----------|-------|
| 81 cont... | 81_8yoM                      | Neutral   | 50.   |
|            | 81_8yoM_front2               | Neutral   | 90.0  |
|            | 81_8yoM_HappyNoTeeth_front2  | Content   | 60.0  |
|            | 81_8yoM_HappyNoTeeth         | Content   | 60.0  |
|            | 81_8yoM_HappyTeeth_front2    | Happy     | 95.0  |
|            | 81_8yoM_HappyTeeth           | Happy     | 95.0  |
|            | 81_8yom_sad_front2           | Sad       | 95.0  |
|            | 81_8yom_sad                  | Sad       | 90.0  |
| 84         | 84_11y_surprise_front2       | Surprised | 100.0 |
|            | 84_11y_surprise              | Surprised | 95.0  |
|            | 84_11yoM_Angry_front2        | Angry     | 25.0  |
|            | 84_11yoM_Angry               | Angry     | 25.0  |
|            | 84_11yoM_disgust_front2      | Disgusted | 80.0  |
|            | 84_11yoM_disgust             | Disgusted | 75.0  |
|            | 84_11yoM_Fear_front2         | Afraid    | 55.0  |
|            | 84_11yoM_Fear                | Afraid    | 45.0  |
|            | 84_11yoM                     | Neutral   | 90.0  |
|            | 84_11yoM_front2              | Neutral   | 100.0 |
|            | 84_11yoM_HappyNoTeeth_front2 | Content   | 100.0 |
|            | 84_11yoM_HappyNoTeeth        | Content   | 100.0 |
|            | 84_11yoM_HappyTeeth_front2   | Happy     | 95.0  |
|            | 84_11yoM_HappyTeeth          | Happy     | 100.0 |
|            | 84_11yom_sad_front2          | Sad       | 100.0 |
|            | 84_11yom_sad                 | Sad       | 95.0  |
| 86         | 86_7y_surprise_front2        | Surprised | 90.0  |
|            | 86_7y_surprise               | Surprised | 85.0  |
|            | 86_7yoM_Angry_front2         | Angry     | 100.0 |
|            | 86_7yoM_Angry                | Angry     | 90.0  |
|            | 86_7yoM_disgust_front2       | Disgusted | 50.0  |
|            | 86_7yoM_disgust              | Disgusted | 65.0  |
|            | 86_7yoM_Fear_front2          | Afraid    | 20.0  |
|            | 86_7yoM_Fear                 | Afraid    | 25.0  |
|            | 86_7yoM                      | Neutral   | 85.0  |
|            | 86_7yoM_front2               | Neutral   | 100.0 |
|            | 86_7yoM_HappyNoTeeth_front2  | Content   | 100.0 |
|            | 86_7yoM_HappyNoTeeth         | Content   | 100.0 |
|            | 86_7yoM_HappyTeeth_front2    | Happy     | 100.0 |
|            | 86_7yoM_HappyTeeth           | Happy     | 100.0 |
|            | 86_7yom_sad_front2           | Sad       | 85.0  |
|            | 86_7yom_sad                  | Sad       | 85.0  |
| 87         | 87_9y_surprise_front2        | Surprised | 55.0  |

| Females  |          |                     |            |
|----------|----------|---------------------|------------|
| Model ID | Image ID | Intended Expression | Rating (%) |

|                    |                     |           |       |
|--------------------|---------------------|-----------|-------|
| 112 cont...        | 112_11yoF_surprise1 | Surprised | 90.0  |
|                    | 112_11yoF_surprise2 | Surprised | 95.0  |
| 113                | 113_15yoF_angry1    | Angry     | 65.0  |
|                    | 113_15yoF_angry2    | Angry     | 80.0  |
|                    | 113_15yoF_content1  | Content   | 90.0  |
|                    | 113_15yoF_content2  | Content   | 100.0 |
|                    | 113_15yoF_disgust1  | Disgusted | 85.0  |
|                    | 113_15yoF_disgust2  | Disgusted | 95.0  |
|                    | 113_15yoF_fear1     | Afraid    | 55.0  |
|                    | 113_15yoF_fear2     | Afraid    | 50.0  |
|                    | 113_15yoF_happy1    | Happy     | 100.0 |
|                    | 113_15yoF_happy2    | Happy     | 100.0 |
|                    | 113_15yoF_neutral1  | Neutral   | 90.0  |
|                    | 113_15yoF_neutral2  | Neutral   | 95.0  |
|                    | 113_15yoF_sad1      | Sad       | 35.0  |
|                    | 113_15yoF_sad2      | Sad       | 55.0  |
|                    | 113_15yoF_surprise1 | Surprised | 95.0  |
|                    | 113_15yoF_surprise2 | Surprised | 70.0  |
| 114                | 114_9yoF_angry1     | Angry     | 90.0  |
|                    | 114_9yoF_angry2     | Angry     | 100.0 |
|                    | 114_9yoF_content1   | Content   | 100.0 |
|                    | 114_9yoF_content2   | Content   | 100.0 |
|                    | 114_9yoF_disgust1   | Disgusted | 95.0  |
|                    | 114_9yoF_disgust2   | Disgusted | 85.0  |
|                    | 114_9yoF_fear1      | Afraid    | 35.0  |
|                    | 114_9yoF_fear2      | Afraid    | 60.0  |
|                    | 114_9yoF_happy1     | Happy     | 100.0 |
|                    | 114_9yoF_happy2     | Happy     | 100.0 |
|                    | 114_9yoF_neutral1   | Neutral   | 90.0  |
|                    | 114_9yoF_neutral2   | Neutral   | 100.0 |
|                    | 114_9yoF_sad1       | Sad       | 85.0  |
|                    | 114_9yoF_sad2       | Sad       | 100.0 |
| 114_9yoF_surprise1 | Surprised           | 80.0      |       |
| 114_9yoF_surprise2 | Surprised           | 95.0      |       |
| 115                | 115_12yoF_angry1    | Angry     | 95.0  |
|                    | 115_12yoF_angry2    | Angry     | 100.0 |
|                    | 115_12yoF_content1  | Content   | 100.0 |
|                    | 115_12yoF_content2  | Content   | 100.0 |
|                    | 115_12yoF_disgust1  | Disgusted | 60.0  |
|                    | 115_12yoF_disgust2  | Disgusted | 70.0  |
|                    | 115_12yoF_fear1     | Afraid    | 90.0  |

| Males    |          |                     |            |
|----------|----------|---------------------|------------|
| Model ID | Image ID | Intended Expression | Rating (%) |

|                             |                             |                       |           |
|-----------------------------|-----------------------------|-----------------------|-----------|
| 87 cont...                  | 87_9y_surprise              | Surprised             | 60.0      |
|                             | 87_9yoM_Angry_front2        | Angry                 | 95.0      |
|                             | 87_9yoM_Angry               | Angry                 | 90.0      |
|                             | 87_9yoM_disgust_front2      | Disgusted             | 85.0      |
|                             | 87_9yoM_disgust             | Disgusted             | 75.0      |
|                             | 87_9yoM_Fear_front2         | Afraid                | 70.0      |
|                             | 87_9yoM_Fear                | Afraid                | 85.0      |
|                             | 87_9yoM                     | Neutral               | 100.0     |
|                             | 87_9yoM_front2              | Neutral               | 100.0     |
|                             | 87_9yoM_HappyNoTeeth_front2 | Content               | 100.0     |
|                             | 87_9yoM_HappyNoTeeth        | Content               | 100.0     |
|                             | 87_9yoM_HappyTeeth_front2   | Happy                 | 100.0     |
|                             | 87_9yoM_HappyTeeth          | Happy                 | 95.0      |
|                             | 87_9yom_sad_front2          | Sad                   | 100.0     |
|                             | 87_9yom_sad                 | Sad                   | 100.0     |
|                             | 89                          | 89_9y_surprise_front2 | Surprised |
| 89_9y_surprise              |                             | Surprised             | 100.0     |
| 89_9yoM_Angry_front2        |                             | Angry                 | 90.0      |
| 89_9yoM_Angry               |                             | Angry                 | 75.0      |
| 89_9yoM_disgust_front2      |                             | Disgusted             | 100.0     |
| 89_9yoM_disgust             |                             | Disgusted             | 100.0     |
| 89_9yoM_Fear_front2         |                             | Afraid                | 10.0      |
| 89_9yoM_Fear                |                             | Afraid                | 10.0      |
| 89_9yoM                     |                             | Neutral               | 95.0      |
| 89_9yoM_front2              |                             | Neutral               | 100.0     |
| 89_9yoM_HappyNoTeeth_front2 |                             | Content               | 100.0     |
| 89_9yoM_HappyNoTeeth        |                             | Content               | 100.0     |
| 89_9yoM_HappyTeeth_front2   |                             | Happy                 | 95.0      |
| 89_9yoM_HappyTeeth          |                             | Happy                 | 95.0      |
| 89_9yom_sad_front2          |                             | Sad                   | 100.0     |
| 89_9yom_sad                 |                             | Sad                   | 85.0      |
| 92                          | 92_8y_surprise_front2       | Surprised             | 66.7      |
|                             | 92_8y_surprise              | Surprised             | 71.4      |
|                             | 92_8yoM_Angry_front2        | Angry                 | 90.5      |
|                             | 92_8yoM_Angry               | Angry                 | 81.0      |
|                             | 92_8yoM_disgust_front2      | Disgusted             | 33.3      |
|                             | 92_8yoM_disgust             | Disgusted             | 28.6      |
|                             | 92_8yoM_Fear_front2         | Afraid                | 57.1      |
|                             | 92_8yoM_Fear                | Afraid                | 52.4      |
|                             | 92_8yoM                     | Neutral               | 100.0     |
|                             | 92_8yoM_front2              | Neutral               | 95.2      |

| Females  |          |                     |            |
|----------|----------|---------------------|------------|
| Model ID | Image ID | Intended Expression | Rating (%) |

|                     |                     |                 |       |      |
|---------------------|---------------------|-----------------|-------|------|
| 115 cont...         | 115_12yoF_fear2     | Afraid          | 90.0  |      |
|                     | 115_12yoF_happy1    | Happy           | 100.0 |      |
|                     | 115_12yoF_happy2    | Happy           | 100.0 |      |
|                     | 115_12yoF_neutral1  | Neutral         | 95.0  |      |
|                     | 115_12yoF_neutral2  | Neutral         | 85.0  |      |
|                     | 115_12yoF_sad1      | Sad             | 100.0 |      |
|                     | 115_12yoF_sad2      | Sad             | 95.0  |      |
|                     | 115_12yoF_surprise1 | Surprised       | 80.0  |      |
|                     | 115_12yoF_surprise2 | Surprised       | 75.0  |      |
|                     | 117                 | 117_9yoF_angry1 | Angry | 75.0 |
|                     |                     | 117_9yoF_angry2 | Angry | 10.0 |
| 117_9yoF_content1   |                     | Content         | 100.0 |      |
| 117_9yoF_content2   |                     | Content         | 95.0  |      |
| 117_9yoF_disgust1   |                     | Disgusted       | 75.0  |      |
| 117_9yoF_disgust2   |                     | Disgusted       | 80.0  |      |
| 117_9yoF_fear1      |                     | Afraid          | 50.0  |      |
| 117_9yoF_fear2      |                     | Afraid          | 70.0  |      |
| 117_9yoF_happy1     |                     | Happy           | 100.0 |      |
| 117_9yoF_happy2     |                     | Happy           | 100.0 |      |
| 117_9yoF_neutral1   |                     | Neutral         | 85.0  |      |
| 117_9yoF_neutral2   |                     | Neutral         | 95.0  |      |
| 117_9yoF_sad1       |                     | Sad             | 100.0 |      |
| 117_9yoF_sad2       |                     | Sad             | 100.0 |      |
| 117_9yoF_surprise1  | Surprised           | 75.0            |       |      |
| 117_9yoF_surprise2  | Surprised           | 85.0            |       |      |
| 119                 | 119_14yoF_angry1    | Angry           | 95.0  |      |
|                     | 119_14yoF_angry2    | Angry           | 95.0  |      |
|                     | 119_14yoF_content1  | Content         | 100.0 |      |
|                     | 119_14yoF_content2  | Content         | 100.0 |      |
|                     | 119_14yoF_disgust1  | Disgusted       | 70.0  |      |
|                     | 119_14yoF_disgust2  | Disgusted       | 70.0  |      |
|                     | 119_14yoF_fear1     | Afraid          | 65.0  |      |
|                     | 119_14yoF_fear2     | Afraid          | 70.0  |      |
|                     | 119_14yoF_happy1    | Happy           | 100.0 |      |
|                     | 119_14yoF_happy2    | Happy           | 95.0  |      |
|                     | 119_14yoF_neutral1  | Neutral         | 80.0  |      |
|                     | 119_14yoF_neutral2  | Neutral         | 85.0  |      |
|                     | 119_14yoF_sad1      | Sad             | 100.0 |      |
|                     | 119_14yoF_sad2      | Sad             | 95.0  |      |
| 119_14yoF_surprise1 | Surprised           | 90.0            |       |      |
| 119_14yoF_surprise2 | Surprised           | 95.0            |       |      |

| Males    |          |                     |            |
|----------|----------|---------------------|------------|
| Model ID | Image ID | Intended Expression | Rating (%) |

|            |                               |           |       |
|------------|-------------------------------|-----------|-------|
| 92 cont... | 92_8yoM_HappyNoTeeth_front2   | Content   | 100.0 |
|            | 92_8yoM_HappyNoTeeth          | Content   | 100.0 |
|            | 92_8yoM_HappyTeeth_front2     | Happy     | 100.0 |
|            | 92_8yoM_HappyTeeth            | Happy     | 100.0 |
|            | 92_8yom_sad_front2            | Sad       | 95.2  |
|            | 92_8yom_sad                   | Sad       | 95.2  |
| 103        | 103_12y_surprise_front2       | Surprised | 90.5  |
|            | 103_12y_surprise              | Surprised | 100.0 |
|            | 103_12yoM_Angry_front2        | Angry     | 23.8  |
|            | 103_12yoM_Angry               | Angry     | 23.8  |
|            | 103_12yoM_disgust_front2      | Disgusted | 90.5  |
|            | 103_12yoM_disgust             | Disgusted | 95.2  |
|            | 103_12yoM_Fear_front2         | Afraid    | 52.4  |
|            | 103_12yoM_Fear                | Afraid    | 71.4  |
|            | 103_12yoM                     | Neutral   | 95.2  |
|            | 103_12yoM_front2              | Neutral   | 90.5  |
|            | 103_12yoM_HappyNoTeeth_front2 | Content   | 85.7  |
|            | 103_12yoM_HappyNoTeeth        | Content   | 100.0 |
|            | 103_12yoM_HappyTeeth_front2   | Happy     | 100.0 |
|            | 103_12yoM_HappyTeeth          | Happy     | 100.0 |
|            | 103_12yom_sad_front2          | Sad       | 71.4  |
|            | 103_12yom_sad                 | Sad       | 85.7  |
| 104        | 104_12y_surprise_front2       | Surprised | 76.2  |
|            | 104_12y_surprise              | Surprised | 76.2  |
|            | 104_12yoM_Angry_front2        | Angry     | 90.5  |
|            | 104_12yoM_Angry               | Angry     | 95.2  |
|            | 104_12yoM_disgust_front2      | Disgusted | 95.2  |
|            | 104_12yoM_disgust             | Disgusted | 95.2  |
|            | 104_12yoM_Fear_front2         | Afraid    | 66.7  |
|            | 104_12yoM_Fear                | Afraid    | 61.9  |
|            | 104_12yoM                     | Neutral   | 85.7  |
|            | 104_12yoM_front2              | Neutral   | 100.0 |
|            | 104_12yoM_HappyNoTeeth_front2 | Content   | 100.0 |
|            | 104_12yoM_HappyNoTeeth        | Content   | 95.2  |
|            | 104_12yoM_HappyTeeth_front2   | Happy     | 100.0 |
|            | 104_12yoM_HappyTeeth          | Happy     | 100.0 |
|            | 104_12yom_sad_front2          | Sad       | 90.5  |
|            | 104_12yom_sad                 | Sad       | 90.5  |
| 107        | 107_14y_surprise_front2       | Surprised | 85.7  |
|            | 107_14y_surprise              | Surprised | 95.2  |
|            | 107_14yoM_Angry_front2        | Angry     | 52.4  |

| Females  |          |                     |            |
|----------|----------|---------------------|------------|
| Model ID | Image ID | Intended Expression | Rating (%) |

|     |                    |           |       |
|-----|--------------------|-----------|-------|
| 120 | 120_9yoF_angry1    | Angry     | 100.0 |
|     | 120_9yoF_angry2    | Angry     | 100.0 |
|     | 120_9yoF_content1  | Content   | 100.0 |
|     | 120_9yoF_content2  | Content   | 75.0  |
|     | 120_9yoF_disgust1  | Disgusted | 90.0  |
|     | 120_9yoF_disgust2  | Disgusted | 90.0  |
|     | 120_9yoF_fear1     | Afraid    | 70.0  |
|     | 120_9yoF_fear2     | Afraid    | 60.0  |
|     | 120_9yoF_happy1    | Happy     | 100.0 |
|     | 120_9yoF_happy2    | Happy     | 100.0 |
|     | 120_9yoF_neutral1  | Neutral   | 90.0  |
|     | 120_9yoF_neutral2  | Neutral   | 100.0 |
|     | 120_9yoF_sad1      | Sad       | 45.0  |
|     | 120_9yoF_sad2      | Sad       | 55.0  |
|     | 120_9yoF_surprise1 | Surprised | 80.0  |
|     | 120_9yoF_surprise2 | Surprised | 95.0  |
| 121 | 121_7yoF_angry1    | Angry     | 10.0  |
|     | 121_7yoF_angry2    | Angry     | 30.0  |
|     | 121_7yoF_content1  | Content   | 75.0  |
|     | 121_7yoF_content2  | Content   | 80.0  |
|     | 121_7yoF_disgust1  | Disgusted | 95.0  |
|     | 121_7yoF_disgust2  | Disgusted | 95.0  |
|     | 121_7yoF_fear1     | Afraid    | 70.0  |
|     | 121_7yoF_fear2     | Afraid    | 70.0  |
|     | 121_7yoF_happy1    | Happy     | 100.0 |
|     | 121_7yoF_happy2    | Happy     | 100.0 |
|     | 121_7yoF_neutral1  | Neutral   | 100.0 |
|     | 121_7yoF_neutral2  | Neutral   | 100.0 |
|     | 121_7yoF_sad1      | Sad       | 30.0  |
|     | 121_7yoF_sad2      | Sad       | 25.0  |
|     | 121_7yoF_surprise1 | Surprised | 90.0  |
|     | 121_7yoF_surprise2 | Surprised | 90.0  |
| 122 | 122_16yoF_angry1   | Angry     | 100.0 |
|     | 122_16yoF_angry2   | Angry     | 90.0  |
|     | 122_16yoF_content1 | Content   | 90.0  |
|     | 122_16yoF_content2 | Content   | 100.0 |
|     | 122_16yoF_disgust1 | Disgusted | 85.0  |
|     | 122_16yoF_disgust2 | Disgusted | 90.0  |
|     | 122_16yoF_fear1    | Afraid    | 65.0  |
|     | 122_16yoF_fear2    | Afraid    | 65.0  |
|     | 122_16yoF_happy1   | Happy     | 95.0  |



| <b>Males</b>    |                 |                            |                   |
|-----------------|-----------------|----------------------------|-------------------|
| <b>Model ID</b> | <b>Image ID</b> | <b>Intended Expression</b> | <b>Rating (%)</b> |

|                               |                               |                         |           |
|-------------------------------|-------------------------------|-------------------------|-----------|
| <b>107 cont...</b>            | 107_14yoM_Angry               | Angry                   | 19.0      |
|                               | 107_14yoM_disgust_front2      | Disgusted               | 81.0      |
|                               | 107_14yoM_disgust             | Disgusted               | 81.0      |
|                               | 107_14yoM_Fear_front2         | Afraid                  | 81.0      |
|                               | 107_14yoM_Fear                | Afraid                  | 71.4      |
|                               | 107_14yoM                     | Neutral                 | 100.0     |
|                               | 107_14yoM_front2              | Neutral                 | 100.0     |
|                               | 107_14yoM_HappyNoTeeth_front2 | Content                 | 71.4      |
|                               | 107_14yoM_HappyNoTeeth        | Content                 | 71.4      |
|                               | 107_14yoM_HappyTeeth_front2   | Happy                   | 100.0     |
|                               | 107_14yoM_HappyTeeth          | Happy                   | 100.0     |
|                               | 107_14yom_sad_front2          | Sad                     | 90.5      |
|                               | 107_14yom_sad                 | Sad                     | 85.7      |
|                               | <b>108</b>                    | 108_10y_surprise_front2 | Surprised |
| 108_10y_surprise              |                               | Surprised               | 81.0      |
| 108_10yoM_Angry_front2        |                               | Angry                   | 81.0      |
| 108_10yoM_Angry               |                               | Angry                   | 81.0      |
| 108_10yoM_disgust_front2      |                               | Disgusted               | 81.0      |
| 108_10yoM_disgust             |                               | Disgusted               | 90.5      |
| 108_10yoM_Fear_front2         |                               | Afraid                  | 57.1      |
| 108_10yoM_Fear                |                               | Afraid                  | 61.9      |
| 108_10yoM                     |                               | Neutral                 | 95.2      |
| 108_10yoM_front2              |                               | Neutral                 | 95.2      |
| 108_10yoM_HappyNoTeeth_front2 |                               | Content                 | 61.9      |
| 108_10yoM_HappyNoTeeth        |                               | Content                 | 95.2      |
| 108_10yoM_HappyTeeth_front2   |                               | Happy                   | 100.0     |
| 108_10yoM_HappyTeeth          |                               | Happy                   | 100.0     |
| 108_10yom_sad_front2          |                               | Sad                     | 90.5      |
| 108_10yom_sad                 |                               | Sad                     | 81.0      |

| <b>Females</b>  |                 |                            |                   |
|-----------------|-----------------|----------------------------|-------------------|
| <b>Model ID</b> | <b>Image ID</b> | <b>Intended Expression</b> | <b>Rating (%)</b> |

|                     |                     |                  |       |
|---------------------|---------------------|------------------|-------|
| <b>122 cont...</b>  | 122_16yoF_happy2    | Happy            | 100.0 |
|                     | 122_16yoF_neutral1  | Neutral          | 100.0 |
|                     | 122_16yoF_neutral2  | Neutral          | 70.0  |
|                     | 122_16yoF_sad1      | Sad              | 80.0  |
|                     | 122_16yoF_sad2      | Sad              | 80.0  |
|                     | 122_16yoF_surprise1 | Surprised        | 100.0 |
|                     | 122_16yoF_surprise2 | Surprised        | 95.0  |
|                     | <b>123</b>          | 123_16yoF_angry1 | Angry |
| 123_16yoF_angry2    |                     | Angry            | 85.0  |
| 123_16yoF_content1  |                     | Content          | 100.0 |
| 123_16yoF_content2  |                     | Content          | 100.0 |
| 123_16yoF_disgust1  |                     | Disgusted        | 85.0  |
| 123_16yoF_disgust2  |                     | Disgusted        | 60.0  |
| 123_16yoF_fear1     |                     | Afraid           | 45.0  |
| 123_16yoF_fear2     |                     | Afraid           | 65.0  |
| 123_16yoF_happy1    |                     | Happy            | 100.0 |
| 123_16yoF_happy2    |                     | Happy            | 100.0 |
| 123_16yoF_neutral1  |                     | Neutral          | 100.0 |
| 123_16yoF_neutral2  |                     | Neutral          | 100.0 |
| 123_16yoF_sad1      |                     | Sad              | 95.0  |
| 123_16yoF_sad2      |                     | Sad              | 90.0  |
| 123_16yoF_surprise1 |                     | Surprised        | 100.0 |
| 123_16yoF_surprise2 | Surprised           | 95.0             |       |
